# Supplementary material for: HLA-Associated Immune Escape Pathways in HIV-1 Subtype B Gag, Pol and Nef Proteins
Source: PLoS One. 2009 Aug 19;4(8):e6687. doi: 10.1371/journal.pone.0006687 (PMC2723923; doi:10.1371/journal.pone.0006687)
Supplement: Table S2 — Amino acid-amino acid (aa-aa) associations in HIV-1 Gag, Protease, Reverse Transcriptase, Integrase and Nef (all q<0.2). Consistent with the immune escape maps and supplementary table 1, amino acid numbering begins with 1 for each individual protein. Predictor Codon and Target Codon refer to the predictor and target attributes, respectively, however it is important to note that this terminology does not imply a specific direction of association. For example, if one is interested in all codons that covary with Gag codon 242, one should investigate all target codons that appear when 242 is set as the predictor variable, and vice versa. The union of these two searches will provide a list of candidate codons that covary with codon 242. In the case of aa-aa associations, adapted refers to positive associations (ie amino acid pairs that statistically tend to co-exist/co-vary) while nonadapted identifies negative associations (ie amino acids that statistically tend not to be found together). Finally, note that in the original analysis, HIV codon covariation was analyzed across all three Pol proteins simultaneously. However, to maintain consistency with Figures 1- 5 in the paper, the data listed in this supplementary table are limited to intra-protein associations only, a fact which should be considered when interpreting the q-values for aa-aa associations in Protease, RT and Integrase. (1.13 MB XLS) [file pone.0006687.s002.xls]

## Sheet: Sheet1
Figure	Protein	Predictor Codon	Predictor AA	Target Codon	Target AA	DIRECTION	p	q
1	GAG	24	E	1	I	ADAPTED	0.00119247	0.133843
1	GAG	34	L	7	I	ADAPTED	3.84e-18	1.89e-14
1	GAG	34	L	7	V	NONADAPTED	4.87e-18	2.3e-14
1	GAG	66	S	7	V	NONADAPTED	0.00134475	0.144533
1	GAG	89	Q	7	I	ADAPTED	0.00221514	0.197602
1	GAG	186	T	7	V	NONADAPTED	0.00094968	0.115367
1	GAG	487	V	7	I	NONADAPTED	0.00102117	0.121699
1	GAG	12	E	8	I	ADAPTED	0.0015463	0.157301
1	GAG	26	K	8	I	NONADAPTED	9.79e-07	0.000529074
1	GAG	26	K	8	L	ADAPTED	5.72e-05	0.0150155
1	GAG	121	A	8	L	NONADAPTED	0.000186197	0.0368655
1	GAG	223	I	8	L	NONADAPTED	0.00115915	0.131634
1	GAG	11	E	9	S	NONADAPTED	0.0022573	0.199809
1	GAG	34	L	9	R	ADAPTED	2.28e-05	0.00725522
1	GAG	34	L	9	S	NONADAPTED	6.42e-07	0.000368504
1	GAG	116	Q	9	S	ADAPTED	0.000219017	0.0413718
1	GAG	119	E	9	R	ADAPTED	5.17e-06	0.00214515
1	GAG	121	A	9	S	NONADAPTED	7.4e-05	0.0183902
1	GAG	472	P	9	T	NONADAPTED	9.41e-06	0.00352242
1	GAG	12	E	10	G	NONADAPTED	0.000214611	0.0407343
1	GAG	30	R	10	A	ADAPTED	0.00136404	0.145437
1	GAG	91	K	10	A	ADAPTED	1.15e-12	3.01e-09
1	GAG	91	K	10	G	NONADAPTED	1.06e-16	4.75e-13
1	GAG	371	N	10	G	NONADAPTED	0.00205868	0.18841
1	GAG	409	K	10	G	NONADAPTED	0.00113027	0.129661
1	GAG	9	R	11	E	ADAPTED	0.000118836	0.0264513
1	GAG	9	R	11	G	NONADAPTED	0.000687817	0.0919738
1	GAG	12	K	11	E	ADAPTED	0.000415019	0.0644245
1	GAG	12	K	11	G	NONADAPTED	0.00143718	0.150093
1	GAG	91	K	11	E	ADAPTED	0.00166689	0.164821
1	GAG	91	R	11	E	ADAPTED	0.000268352	0.0478109
1	GAG	91	K	11	G	NONADAPTED	0.000352358	0.0579234
1	GAG	93	K	11	G	NONADAPTED	7.96e-06	0.00305143
1	GAG	479	V	11	E	ADAPTED	0.000736646	0.0967498
1	GAG	479	V	11	G	NONADAPTED	0.00100939	0.120981
1	GAG	10	G	12	E	NONADAPTED	9.81e-09	1.02e-05
1	GAG	11	E	12	E	NONADAPTED	9.26e-05	0.0219465
1	GAG	11	G	12	K	NONADAPTED	9.13e-09	9.55e-06
1	GAG	15	R	12	D	ADAPTED	0.000282141	0.0495284
1	GAG	15	A	12	E	NONADAPTED	4.36e-07	0.00026553
1	GAG	15	H	12	E	NONADAPTED	3.06e-06	0.00138287
1	GAG	15	Q	12	E	NONADAPTED	5.85e-14	1.88e-10
1	GAG	15	S	12	E	NONADAPTED	9.4e-05	0.0221504
1	GAG	15	T	12	E	NONADAPTED	4.23e-07	0.000258634
1	GAG	15	A	12	K	ADAPTED	1.95e-09	2.46e-06
1	GAG	15	H	12	K	ADAPTED	0.000934209	0.114067
1	GAG	15	Q	12	K	ADAPTED	2.66e-10	4.23e-07
1	GAG	15	R	12	K	NONADAPTED	3.22e-19	1.88e-15
1	GAG	15	S	12	K	ADAPTED	0.000414132	0.0643267
1	GAG	15	T	12	K	ADAPTED	0.000262459	0.0471628
1	GAG	28	K	12	E	ADAPTED	0.000121543	0.0268632
1	GAG	28	K	12	Q	NONADAPTED	4.94e-06	0.00205692
1	GAG	30	Q	12	D	ADAPTED	9.93e-05	0.0231346
1	GAG	34	V	12	E	ADAPTED	0.000370086	0.0596264
1	GAG	54	S	12	E	ADAPTED	0.000872945	0.109437
1	GAG	55	G	12	D	ADAPTED	0.000735689	0.0966747
1	GAG	55	E	12	K	ADAPTED	1.11e-05	0.00406129
1	GAG	63	Q	12	K	NONADAPTED	0.000412947	0.0643019
1	GAG	72	S	12	E	ADAPTED	1.61e-05	0.00549232
1	GAG	72	S	12	K	NONADAPTED	1.56e-05	0.0053746
1	GAG	76	K	12	D	NONADAPTED	0.000755897	0.0987097
1	GAG	91	K	12	D	ADAPTED	6.96e-05	0.0176996
1	GAG	91	G	12	E	NONADAPTED	2.31e-26	2.15e-22
1	GAG	91	N	12	E	NONADAPTED	6.74e-24	5.12e-20
1	GAG	91	Q	12	E	NONADAPTED	7.92e-05	0.0193391
1	GAG	91	G	12	K	ADAPTED	3.12e-33	3.56e-29
1	GAG	91	K	12	K	NONADAPTED	9.88e-15	3.87e-11
1	GAG	91	N	12	K	ADAPTED	1.02e-25	8.85e-22
1	GAG	91	S	12	K	ADAPTED	1.79e-07	0.000124877
1	GAG	95	K	12	K	NONADAPTED	0.000488545	0.0720135
1	GAG	147	M	12	E	ADAPTED	0.00127804	0.140063
1	GAG	147	L	12	Q	NONADAPTED	8.64e-05	0.0207719
1	GAG	280	I	12	K	ADAPTED	0.000829228	0.105192
1	GAG	357	A	12	D	ADAPTED	0.00102262	0.121809
1	GAG	386	H	12	G	ADAPTED	5.77e-06	0.00234313
1	GAG	388	K	12	Q	ADAPTED	1.77e-05	0.0058936
1	GAG	427	N	12	D	ADAPTED	0.000107232	0.0247013
1	GAG	427	N	12	E	NONADAPTED	0.0015222	0.155794
1	GAG	473	S	12	A	ADAPTED	0.000862407	0.108604
1	GAG	487	S	12	Q	ADAPTED	0.000749285	0.0980505
1	GAG	10	G	15	K	NONADAPTED	0.000716857	0.0948459
1	GAG	10	G	15	R	ADAPTED	0.0013225	0.142937
1	GAG	12	K	15	A	ADAPTED	2.32e-10	3.76e-07
1	GAG	12	K	15	H	ADAPTED	0.000165955	0.033929
1	GAG	12	K	15	Q	ADAPTED	1.34e-15	5.6e-12
1	GAG	12	K	15	R	NONADAPTED	5.51e-22	3.95e-18
1	GAG	12	K	15	S	ADAPTED	1.48e-05	0.00519768
1	GAG	12	K	15	T	ADAPTED	5.99e-06	0.0024182
1	GAG	18	K	15	K	NONADAPTED	0.000304376	0.0520836
1	GAG	18	K	15	R	ADAPTED	0.00027322	0.0483689
1	GAG	30	Q	15	K	ADAPTED	2.59e-05	0.00805833
1	GAG	30	Q	15	R	NONADAPTED	0.00184192	0.175353
1	GAG	30	M	15	T	ADAPTED	2.51e-08	2.29e-05
1	GAG	58	Q	15	R	NONADAPTED	0.00178116	0.171818
1	GAG	76	R	15	K	ADAPTED	2.87e-05	0.0088048
1	GAG	91	R	15	H	ADAPTED	0.000201753	0.0390215
1	GAG	91	E	15	K	ADAPTED	0.00172437	0.168708
1	GAG	91	G	15	K	ADAPTED	8.79e-05	0.0210457
1	GAG	91	N	15	K	ADAPTED	0.00169155	0.166472
1	GAG	91	R	15	Q	ADAPTED	2.9e-12	6.86e-09
1	GAG	93	K	15	E	ADAPTED	8.32e-05	0.0200681
1	GAG	107	V	15	A	ADAPTED	0.00221842	0.197648
1	GAG	125	C	15	R	ADAPTED	0.00142808	0.149704
1	GAG	228	V	15	K	ADAPTED	0.000882268	0.1099
1	GAG	371	T	15	Q	ADAPTED	0.000130783	0.0284296
1	GAG	378	V	15	A	ADAPTED	0.00223907	0.198826
1	GAG	386	P	15	E	ADAPTED	0.00158001	0.159501
1	GAG	389	P	15	K	NONADAPTED	0.000871315	0.109287
1	GAG	418	N	15	K	ADAPTED	0.00152731	0.156127
1	GAG	418	Q	15	T	ADAPTED	0.00145628	0.151332
1	GAG	466	R	15	K	NONADAPTED	0.00143152	0.149814
1	GAG	473	H	15	K	ADAPTED	0.000255902	0.0463614
1	GAG	474	K	15	A	ADAPTED	0.000293037	0.0509072
1	GAG	484	H	15	T	ADAPTED	0.000212378	0.040422
1	GAG	1	I	16	W	NONADAPTED	3.33e-09	3.99e-06
1	GAG	55	G	17	E	NONADAPTED	0.00204523	0.187689
1	GAG	55	G	17	K	ADAPTED	0.00204023	0.187405
1	GAG	11	G	18	K	ADAPTED	6.13e-05	0.0160025
1	GAG	11	G	18	R	NONADAPTED	2.24e-05	0.00714303
1	GAG	15	K	18	K	NONADAPTED	0.00024039	0.0442514
1	GAG	15	K	18	R	ADAPTED	0.000408911	0.0637129
1	GAG	26	N	18	K	NONADAPTED	5.25e-05	0.0140464
1	GAG	26	N	18	R	ADAPTED	0.00125077	0.138221
1	GAG	30	R	18	G	ADAPTED	0.0010285	0.122046
1	GAG	74	G	18	K	NONADAPTED	0.000442608	0.0671692
1	GAG	255	P	18	G	NONADAPTED	0.000282336	0.0495284
1	GAG	487	D	18	R	ADAPTED	0.00140085	0.147515
1	GAG	25	G	20	R	ADAPTED	9.44e-05	0.0221504
1	GAG	28	R	20	Q	ADAPTED	3e-10	4.61e-07
1	GAG	28	R	20	R	NONADAPTED	6.2e-08	4.88e-05
1	GAG	30	M	20	K	ADAPTED	5.08e-08	4.14e-05
1	GAG	49	G	20	Q	NONADAPTED	0.00019986	0.0388351
1	GAG	49	G	20	R	ADAPTED	1.52e-05	0.00528876
1	GAG	59	Q	20	R	ADAPTED	0.000157395	0.0326851
1	GAG	76	R	20	Q	ADAPTED	0.000562924	0.0797813
1	GAG	76	K	20	R	ADAPTED	1.79e-05	0.0059316
1	GAG	95	K	20	Q	NONADAPTED	1.71e-05	0.00576782
1	GAG	95	K	20	R	ADAPTED	8.11e-07	0.000448262
1	GAG	126	S	20	R	NONADAPTED	0.000623923	0.0858086
1	GAG	203	D	20	R	NONADAPTED	9.77e-05	0.0228678
1	GAG	1	I	24	E	ADAPTED	3.66e-09	4.31e-06
1	GAG	1	I	24	G	NONADAPTED	1.96e-08	1.85e-05
1	GAG	403	K	24	G	ADAPTED	0.000570927	0.0805938
1	GAG	20	R	25	G	ADAPTED	0.000761464	0.0991785
1	GAG	8	I	26	K	NONADAPTED	6.67e-07	0.000379593
1	GAG	12	Q	26	R	ADAPTED	0.00132988	0.143611
1	GAG	18	K	26	K	ADAPTED	0.000923736	0.113147
1	GAG	18	K	26	N	NONADAPTED	0.00048979	0.0720626
1	GAG	28	Q	26	K	ADAPTED	0.000879032	0.109707
1	GAG	28	R	26	K	NONADAPTED	2.1e-05	0.00674654
1	GAG	28	R	26	N	ADAPTED	6.09e-10	8.58e-07
1	GAG	30	K	26	N	ADAPTED	0.000590577	0.0822597
1	GAG	55	D	26	N	ADAPTED	0.000873946	0.109464
1	GAG	61	I	26	K	ADAPTED	0.00032604	0.0548553
1	GAG	76	K	26	R	NONADAPTED	0.00182064	0.173922
1	GAG	81	A	26	K	ADAPTED	0.000974436	0.117882
1	GAG	280	S	26	N	ADAPTED	9.21e-05	0.0218712
1	GAG	286	K	26	R	NONADAPTED	0.000477922	0.0708568
1	GAG	475	K	26	K	NONADAPTED	0.002206	0.197006
1	GAG	479	E	26	K	NONADAPTED	0.00163853	0.162979
1	GAG	480	K	26	K	NONADAPTED	0.000164868	0.03375
1	GAG	480	K	26	R	ADAPTED	0.000219397	0.0414123
1	GAG	12	Q	28	K	NONADAPTED	6.65e-08	5.17e-05
1	GAG	12	Q	28	Q	ADAPTED	1.81e-05	0.00598609
1	GAG	20	R	28	Q	ADAPTED	7.63e-05	0.0187993
1	GAG	20	Q	28	R	ADAPTED	4.08e-07	0.000250336
1	GAG	20	R	28	R	NONADAPTED	0.00216839	0.194477
1	GAG	26	N	28	K	NONADAPTED	0.000646631	0.0882156
1	GAG	26	N	28	R	ADAPTED	7.27e-10	1.02e-06
1	GAG	30	K	28	K	NONADAPTED	1.9e-18	9.52e-15
1	GAG	30	M	28	K	NONADAPTED	0.000296903	0.0512241
1	GAG	30	K	28	Q	ADAPTED	6.58e-07	0.000375841
1	GAG	30	R	28	R	NONADAPTED	1.33e-08	1.33e-05
1	GAG	34	I	28	R	ADAPTED	0.000974621	0.117882
1	GAG	46	V	28	Q	NONADAPTED	0.000717429	0.094851
1	GAG	49	G	28	Q	NONADAPTED	0.00116954	0.132137
1	GAG	61	I	28	Q	NONADAPTED	0.000119289	0.0265011
1	GAG	67	A	28	C	ADAPTED	0.000461787	0.0691181
1	GAG	76	K	28	Q	NONADAPTED	0.000196523	0.038365
1	GAG	81	A	28	Q	NONADAPTED	0.00114175	0.130545
1	GAG	81	A	28	T	ADAPTED	0.000467335	0.0698652
1	GAG	84	V	28	Q	ADAPTED	0.000146365	0.0309062
1	GAG	91	K	28	R	NONADAPTED	0.000106564	0.0245926
1	GAG	93	E	28	K	ADAPTED	0.00147636	0.152598
1	GAG	93	E	28	Q	NONADAPTED	6.54e-06	0.00261428
1	GAG	95	R	28	K	NONADAPTED	1.05e-08	1.08e-05
1	GAG	95	R	28	Q	ADAPTED	0.000271084	0.0481811
1	GAG	98	Q	28	K	NONADAPTED	9.07e-06	0.00344146
1	GAG	102	D	28	K	NONADAPTED	3.41e-08	3.01e-05
1	GAG	102	D	28	Q	ADAPTED	4.1e-05	0.0116746
1	GAG	122	K	28	T	ADAPTED	0.000524422	0.0759114
1	GAG	124	D	28	K	NONADAPTED	0.0011699	0.132137
1	GAG	138	I	28	T	ADAPTED	0.000225726	0.0422888
1	GAG	159	V	28	T	ADAPTED	0.00200171	0.185155
1	GAG	252	S	28	C	ADAPTED	0.00155197	0.157754
1	GAG	252	N	28	K	NONADAPTED	0.000421221	0.0649053
1	GAG	252	N	28	T	ADAPTED	0.00112079	0.129149
1	GAG	369	Q	28	R	ADAPTED	0.00224988	0.199345
1	GAG	472	P	28	Q	ADAPTED	0.00068518	0.091773
1	GAG	479	G	28	Q	ADAPTED	0.000140702	0.030096
1	GAG	484	E	28	H	ADAPTED	0.000200844	0.0389576
1	GAG	9	R	30	M	ADAPTED	0.000154346	0.0321316
1	GAG	10	G	30	K	ADAPTED	0.00198196	0.184094
1	GAG	10	A	30	Q	NONADAPTED	0.000793458	0.102021
1	GAG	10	A	30	R	ADAPTED	9.22e-06	0.00347383
1	GAG	12	E	30	R	ADAPTED	0.000455376	0.0684034
1	GAG	15	T	30	M	ADAPTED	7.71e-05	0.0188822
1	GAG	15	K	30	Q	ADAPTED	1.3e-06	0.000670521
1	GAG	28	K	30	K	NONADAPTED	4.01e-07	0.000247899
1	GAG	28	Q	30	Q	NONADAPTED	6.33e-06	0.00253613
1	GAG	34	I	30	K	ADAPTED	0.00157605	0.15942
1	GAG	34	I	30	R	NONADAPTED	3.86e-05	0.0111345
1	GAG	35	V	30	R	ADAPTED	0.00200332	0.185197
1	GAG	39	R	30	R	NONADAPTED	0.0001417	0.0302302
1	GAG	54	T	30	R	NONADAPTED	0.000674687	0.0909942
1	GAG	75	F	30	Q	ADAPTED	0.000261844	0.0471198
1	GAG	76	K	30	Q	ADAPTED	0.000124059	0.027371
1	GAG	81	L	30	R	ADAPTED	0.00212879	0.192176
1	GAG	107	E	30	R	NONADAPTED	1.13e-06	0.000597844
1	GAG	111	N	30	R	ADAPTED	0.00202213	0.18624
1	GAG	301	Y	30	Q	ADAPTED	0.00130706	0.141818
1	GAG	481	E	30	R	ADAPTED	0.00197537	0.183803
1	GAG	487	I	30	K	NONADAPTED	0.000797664	0.10244
1	GAG	15	K	31	I	ADAPTED	0.00164392	0.163192
1	GAG	30	M	31	I	ADAPTED	0.000199427	0.0388111
1	GAG	113	Q	31	M	ADAPTED	0.00112885	0.129661
1	GAG	143	T	31	I	ADAPTED	9.85e-06	0.00365888
1	GAG	224	A	31	M	NONADAPTED	0.00197264	0.183617
1	GAG	480	K	31	L	NONADAPTED	2.8e-05	0.00860839
1	GAG	487	A	31	L	ADAPTED	0.000394406	0.0623952
1	GAG	7	I	34	I	NONADAPTED	4.12e-18	1.99e-14
1	GAG	7	I	34	L	ADAPTED	7.26e-20	4.44e-16
1	GAG	9	S	34	I	ADAPTED	0.000201557	0.0390136
1	GAG	9	R	34	L	ADAPTED	1.32e-06	0.000677789
1	GAG	12	K	34	I	NONADAPTED	1.42e-06	0.000722706
1	GAG	12	K	34	L	ADAPTED	1.94e-10	3.25e-07
1	GAG	12	E	34	V	ADAPTED	6.54e-08	5.09e-05
1	GAG	30	R	34	I	NONADAPTED	6.9e-07	0.000389883
1	GAG	30	R	34	V	ADAPTED	0.00149311	0.153822
1	GAG	85	L	34	L	NONADAPTED	7.1e-05	0.0179138
1	GAG	143	V	34	I	ADAPTED	0.000252827	0.0460256
1	GAG	223	L	34	I	NONADAPTED	0.0013868	0.146812
1	GAG	223	L	34	L	ADAPTED	0.000421666	0.0649341
1	GAG	228	M	34	L	ADAPTED	0.000105043	0.0243312
1	GAG	453	T	34	I	ADAPTED	0.000422912	0.0650859
1	GAG	497	P	34	V	NONADAPTED	0.00141448	0.148589
1	GAG	499	L	34	L	ADAPTED	0.000241959	0.0444016
1	GAG	99	E	36	W	ADAPTED	0.000195664	0.038227
1	GAG	482	E	38	G	NONADAPTED	4.13e-05	0.0117066
1	GAG	482	E	38	S	ADAPTED	9.83e-06	0.00365888
1	GAG	46	L	42	D	ADAPTED	6.64e-06	0.00263967
1	GAG	46	L	42	E	NONADAPTED	6.72e-06	0.0026551
1	GAG	46	I	43	R	NONADAPTED	2.04e-06	0.000968616
1	GAG	68	I	44	F	NONADAPTED	0.000195207	0.0381972
1	GAG	46	I	45	A	NONADAPTED	5.18e-09	5.91e-06
1	GAG	46	I	45	S	ADAPTED	2.74e-10	4.28e-07
1	GAG	72	S	45	A	ADAPTED	0.00192078	0.180127
1	GAG	72	S	45	S	NONADAPTED	0.000473213	0.0704501
1	GAG	138	M	45	S	ADAPTED	0.000371838	0.0597935
1	GAG	28	H	46	L	ADAPTED	0.00179876	0.172686
1	GAG	28	Q	46	L	ADAPTED	0.000661961	0.0895855
1	GAG	28	Q	46	V	NONADAPTED	0.000892146	0.110683
1	GAG	43	R	46	I	NONADAPTED	8.58e-05	0.0206598
1	GAG	44	Y	46	V	NONADAPTED	0.00164617	0.163352
1	GAG	45	S	46	I	ADAPTED	3.22e-10	4.83e-07
1	GAG	45	A	46	V	ADAPTED	2.15e-06	0.00101261
1	GAG	60	I	46	L	NONADAPTED	5.2e-11	9.81e-08
1	GAG	60	I	46	V	ADAPTED	1.32e-05	0.00473062
1	GAG	64	I	46	L	ADAPTED	0.000328228	0.0551124
1	GAG	66	S	46	I	ADAPTED	1.58e-08	1.54e-05
1	GAG	66	S	46	V	NONADAPTED	8.63e-08	6.48e-05
1	GAG	72	S	46	L	NONADAPTED	4.52e-06	0.00191025
1	GAG	72	S	46	V	ADAPTED	1.95e-07	0.000134287
1	GAG	75	L	46	I	NONADAPTED	0.000131982	0.0285911
1	GAG	75	I	46	L	ADAPTED	9.88e-08	7.31e-05
1	GAG	75	I	46	V	NONADAPTED	1.99e-11	4.05e-08
1	GAG	138	L	46	V	ADAPTED	8.02e-05	0.019483
1	GAG	437	V	46	V	NONADAPTED	0.00181299	0.173521
1	GAG	20	R	49	G	ADAPTED	0.000220366	0.041564
1	GAG	20	R	49	S	NONADAPTED	0.00207753	0.189224
1	GAG	76	K	49	G	NONADAPTED	0.00188765	0.178018
1	GAG	76	K	49	S	ADAPTED	0.000543102	0.0778962
1	GAG	91	K	49	G	ADAPTED	0.000495494	0.0724472
1	GAG	143	T	49	G	NONADAPTED	0.000784069	0.101125
1	GAG	186	M	49	D	ADAPTED	4.15e-05	0.0117772
1	GAG	417	R	49	G	NONADAPTED	0.000354575	0.0579839
1	GAG	417	R	49	S	ADAPTED	0.000680359	0.0914642
1	GAG	82	V	51	L	ADAPTED	2.54e-07	0.000170286
1	GAG	82	V	51	M	NONADAPTED	6.61e-06	0.00263525
1	GAG	138	A	53	S	ADAPTED	0.000142169	0.0303008
1	GAG	138	A	53	T	NONADAPTED	0.000143256	0.0305009
1	GAG	12	E	54	P	NONADAPTED	0.000106745	0.0246117
1	GAG	12	E	54	S	ADAPTED	1.12e-05	0.00406615
1	GAG	26	N	54	G	ADAPTED	0.00110006	0.127345
1	GAG	55	A	54	A	ADAPTED	0.00119944	0.134384
1	GAG	71	G	54	S	ADAPTED	0.000632253	0.0867639
1	GAG	91	Q	54	A	ADAPTED	0.00025388	0.0461449
1	GAG	103	Q	54	A	ADAPTED	0.000278968	0.0492107
1	GAG	103	R	54	T	ADAPTED	0.000152721	0.0319234
1	GAG	105	E	54	A	NONADAPTED	0.00168208	0.165865
1	GAG	219	P	54	S	ADAPTED	0.00114902	0.131179
1	GAG	248	A	54	A	NONADAPTED	0.00122442	0.136296
1	GAG	390	I	54	T	NONADAPTED	0.000991521	0.11918
1	GAG	401	I	54	P	NONADAPTED	0.000280825	0.0494017
1	GAG	483	L	54	P	ADAPTED	0.00158545	0.159855
1	GAG	12	K	55	A	NONADAPTED	0.00162967	0.162614
1	GAG	12	K	55	E	ADAPTED	1.32e-08	1.32e-05
1	GAG	12	K	55	G	NONADAPTED	0.000350684	0.0577239
1	GAG	26	N	55	D	ADAPTED	0.00127997	0.140152
1	GAG	26	N	55	E	NONADAPTED	0.0020831	0.189402
1	GAG	62	A	55	E	NONADAPTED	0.00121602	0.135576
1	GAG	62	E	55	E	NONADAPTED	5.83e-05	0.01527
1	GAG	62	G	55	E	ADAPTED	2.52e-12	6.26e-09
1	GAG	62	E	55	G	ADAPTED	4.84e-19	2.58e-15
1	GAG	62	G	55	G	NONADAPTED	2.8e-05	0.00861094
1	GAG	68	L	55	E	NONADAPTED	0.00115043	0.131179
1	GAG	79	Y	55	E	NONADAPTED	1.41e-05	0.00497295
1	GAG	79	Y	55	G	ADAPTED	0.000171542	0.0348703
1	GAG	81	A	55	D	NONADAPTED	0.000532077	0.0767538
1	GAG	113	Q	55	E	ADAPTED	0.000203059	0.0392438
1	GAG	121	D	55	A	ADAPTED	0.00124933	0.138123
1	GAG	126	S	55	A	ADAPTED	0.00150302	0.154525
1	GAG	348	T	55	D	NONADAPTED	0.000652948	0.0886299
1	GAG	374	N	55	A	ADAPTED	0.00178439	0.171818
1	GAG	381	S	55	A	ADAPTED	0.000493956	0.0723362
1	GAG	478	L	55	A	ADAPTED	0.000933471	0.114067
1	GAG	28	K	58	K	NONADAPTED	0.000452026	0.0681042
1	GAG	54	T	58	R	ADAPTED	0.00115002	0.131179
1	GAG	61	M	58	K	ADAPTED	0.000105678	0.0244557
1	GAG	61	M	58	Q	ADAPTED	0.000453279	0.068211
1	GAG	61	M	58	R	NONADAPTED	4.79e-07	0.000284042
1	GAG	62	I	58	K	ADAPTED	0.0001692	0.0345361
1	GAG	62	I	58	R	NONADAPTED	0.00116033	0.131709
1	GAG	67	S	58	R	ADAPTED	0.000868883	0.109189
1	GAG	78	L	58	R	NONADAPTED	0.00205975	0.188439
1	GAG	81	T	58	K	NONADAPTED	0.000105816	0.024465
1	GAG	81	T	58	R	ADAPTED	0.000126777	0.0277995
1	GAG	90	Q	58	K	NONADAPTED	0.00214015	0.192702
1	GAG	107	E	58	Q	NONADAPTED	8.08e-07	0.000447649
1	GAG	124	K	58	K	ADAPTED	0.00112296	0.129339
1	GAG	124	K	58	R	NONADAPTED	0.000492609	0.0722233
1	GAG	127	Q	58	K	ADAPTED	0.0013695	0.145695
1	GAG	138	A	58	K	NONADAPTED	7.94e-05	0.0193631
1	GAG	147	L	58	K	ADAPTED	0.00180977	0.173345
1	GAG	46	V	59	K	ADAPTED	0.000203277	0.0392558
1	GAG	46	V	59	Q	NONADAPTED	0.00121127	0.135288
1	GAG	67	A	59	K	NONADAPTED	0.0010533	0.123933
1	GAG	98	K	59	K	NONADAPTED	0.000650662	0.0884675
1	GAG	98	K	59	Q	ADAPTED	0.00208566	0.189495
1	GAG	411	K	59	Q	NONADAPTED	0.0018857	0.177968
1	GAG	468	E	59	R	NONADAPTED	0.00171926	0.168497
1	GAG	46	L	60	I	NONADAPTED	2.6e-12	6.32e-09
1	GAG	46	L	60	L	ADAPTED	2.6e-12	6.32e-09
1	GAG	82	V	60	I	ADAPTED	5.26e-09	5.95e-06
1	GAG	82	V	60	L	NONADAPTED	5.26e-09	5.95e-06
1	GAG	28	Q	61	I	NONADAPTED	0.000551685	0.0788567
1	GAG	30	M	61	L	NONADAPTED	0.00123611	0.137024
1	GAG	54	A	61	L	NONADAPTED	0.00179597	0.172617
1	GAG	58	R	61	M	NONADAPTED	3.23e-09	3.9e-06
1	GAG	67	S	61	M	NONADAPTED	0.000185206	0.0367563
1	GAG	103	K	61	L	NONADAPTED	0.00111326	0.128446
1	GAG	339	T	61	I	ADAPTED	0.000884144	0.110016
1	GAG	9	R	62	K	ADAPTED	0.0021895	0.195741
1	GAG	15	K	62	G	ADAPTED	0.00035692	0.0582534
1	GAG	34	L	62	S	ADAPTED	0.000395718	0.0624328
1	GAG	55	E	62	E	NONADAPTED	9.21e-06	0.00347383
1	GAG	55	G	62	E	ADAPTED	3.44e-21	2.27e-17
1	GAG	55	E	62	G	ADAPTED	5.12e-20	3.21e-16
1	GAG	55	G	62	G	NONADAPTED	1.17e-06	0.000616438
1	GAG	55	D	62	V	ADAPTED	0.000292394	0.0508308
1	GAG	58	R	62	G	ADAPTED	3.27e-05	0.00977369
1	GAG	58	K	62	I	ADAPTED	0.000281895	0.0495204
1	GAG	59	Q	62	I	NONADAPTED	0.000763581	0.0993743
1	GAG	69	Q	62	E	NONADAPTED	4.36e-13	1.23e-09
1	GAG	69	Q	62	G	ADAPTED	2.03e-05	0.00656847
1	GAG	69	E	62	R	ADAPTED	0.00162914	0.162614
1	GAG	76	R	62	R	NONADAPTED	0.000323876	0.0546745
1	GAG	79	Y	62	E	NONADAPTED	1.39e-06	0.00070929
1	GAG	79	Y	62	G	ADAPTED	5.99e-06	0.0024182
1	GAG	84	V	62	G	ADAPTED	1.55e-05	0.0053746
1	GAG	90	A	62	K	ADAPTED	0.00174833	0.169946
1	GAG	108	R	62	E	ADAPTED	0.000197362	0.0384988
1	GAG	108	Q	62	G	ADAPTED	4.87e-07	0.000287218
1	GAG	110	E	62	K	ADAPTED	0.000271756	0.0482119
1	GAG	111	S	62	E	ADAPTED	3.81e-06	0.00165276
1	GAG	121	D	62	E	NONADAPTED	7.57e-05	0.0186969
1	GAG	121	D	62	G	ADAPTED	0.00136945	0.145695
1	GAG	203	E	62	Q	NONADAPTED	0.000480688	0.0711407
1	GAG	248	G	62	V	NONADAPTED	0.00141369	0.148569
1	GAG	332	S	62	E	ADAPTED	7.61e-05	0.0187652
1	GAG	372	G	62	A	ADAPTED	0.00139732	0.147503
1	GAG	385	N	62	I	ADAPTED	0.00217749	0.195015
1	GAG	409	K	62	G	NONADAPTED	0.00087512	0.109464
1	GAG	427	N	62	E	ADAPTED	0.00151716	0.155405
1	GAG	443	E	62	V	ADAPTED	0.000448593	0.0676682
1	GAG	495	N	62	E	ADAPTED	0.0010998	0.127345
1	GAG	66	S	63	H	ADAPTED	0.000671276	0.0906804
1	GAG	66	S	63	Q	NONADAPTED	0.000549721	0.0787333
1	GAG	93	D	63	H	ADAPTED	0.000634975	0.0870422
1	GAG	462	S	63	Q	ADAPTED	0.00130957	0.141968
1	GAG	46	L	64	I	ADAPTED	4.08e-07	0.000250336
1	GAG	46	L	64	L	NONADAPTED	1.27e-06	0.0006584
1	GAG	252	S	64	I	ADAPTED	0.00115614	0.13153
1	GAG	252	S	64	L	NONADAPTED	0.000574247	0.0807474
1	GAG	372	G	64	I	ADAPTED	0.000424547	0.0652056
1	GAG	372	G	64	L	NONADAPTED	0.00136499	0.145462
1	GAG	62	E	65	H	NONADAPTED	1.31e-05	0.00469956
1	GAG	62	E	65	Q	ADAPTED	0.000724058	0.0955971
1	GAG	286	K	65	Q	NONADAPTED	0.000487501	0.0720135
1	GAG	437	V	65	Q	NONADAPTED	0.0010867	0.126344
1	GAG	7	I	66	S	ADAPTED	0.000503937	0.0734975
1	GAG	31	M	66	S	ADAPTED	0.000934429	0.114067
1	GAG	46	V	66	P	ADAPTED	2.86e-07	0.000189326
1	GAG	46	V	66	S	NONADAPTED	5.15e-08	4.18e-05
1	GAG	69	P	66	P	NONADAPTED	0.00136106	0.145255
1	GAG	86	W	66	P	NONADAPTED	0.00213221	0.192176
1	GAG	95	K	66	P	NONADAPTED	0.000491871	0.0721995
1	GAG	95	R	66	S	NONADAPTED	0.000916631	0.112551
1	GAG	111	G	66	P	NONADAPTED	0.000529929	0.07652
1	GAG	111	G	66	S	ADAPTED	0.000740757	0.0971371
1	GAG	479	M	66	P	NONADAPTED	0.000763759	0.0993743
1	GAG	48	A	67	A	ADAPTED	8.19e-05	0.0198131
1	GAG	48	A	67	S	NONADAPTED	0.00011611	0.0259829
1	GAG	55	E	67	A	ADAPTED	0.000963996	0.116823
1	GAG	55	E	67	S	NONADAPTED	0.000287058	0.0501814
1	GAG	66	S	67	T	ADAPTED	0.000472785	0.0704281
1	GAG	69	Q	67	A	NONADAPTED	0.000740562	0.0971371
1	GAG	69	E	67	S	ADAPTED	0.00203742	0.187285
1	GAG	69	Q	67	S	ADAPTED	1.88e-06	0.00090139
1	GAG	69	Q	67	T	NONADAPTED	1.73e-05	0.00580317
1	GAG	72	S	67	A	NONADAPTED	1.82e-06	0.000877673
1	GAG	72	S	67	S	ADAPTED	4.03e-05	0.0115537
1	GAG	75	F	67	A	ADAPTED	1.31e-10	2.27e-07
1	GAG	75	F	67	S	NONADAPTED	3.86e-10	5.63e-07
1	GAG	78	L	67	A	NONADAPTED	3.35e-06	0.00148621
1	GAG	78	L	67	S	ADAPTED	3.43e-05	0.0101624
1	GAG	82	V	67	A	ADAPTED	4.68e-08	3.9e-05
1	GAG	82	V	67	S	NONADAPTED	8.41e-10	1.14e-06
1	GAG	84	V	67	S	ADAPTED	0.00188073	0.177834
1	GAG	104	V	67	A	NONADAPTED	1.63e-05	0.00552601
1	GAG	104	V	67	S	ADAPTED	4.76e-06	0.00199217
1	GAG	215	V	67	T	ADAPTED	0.00216292	0.194126
1	GAG	268	M	67	A	NONADAPTED	4.46e-06	0.00188801
1	GAG	268	M	67	S	ADAPTED	4.18e-06	0.00177841
1	GAG	339	T	67	A	NONADAPTED	0.000468728	0.0699484
1	GAG	339	T	67	T	ADAPTED	0.000732252	0.096487
1	GAG	483	L	67	A	NONADAPTED	0.00187373	0.177322
1	GAG	483	L	67	S	ADAPTED	0.000258805	0.046707
1	GAG	44	F	68	I	NONADAPTED	0.000111229	0.025389
1	GAG	44	F	68	L	ADAPTED	0.000150182	0.0315001
1	GAG	385	N	68	I	NONADAPTED	0.00145943	0.151534
1	GAG	385	N	68	L	ADAPTED	0.00189724	0.178587
1	GAG	11	G	69	Q	NONADAPTED	0.00183841	0.175153
1	GAG	12	K	69	K	ADAPTED	0.000255454	0.0463356
1	GAG	12	K	69	Q	NONADAPTED	6.7e-05	0.0171994
1	GAG	15	A	69	Q	NONADAPTED	0.00172606	0.168809
1	GAG	34	V	69	K	ADAPTED	0.00143921	0.15018
1	GAG	45	S	69	K	ADAPTED	0.00214178	0.19278
1	GAG	46	V	69	N	NONADAPTED	0.00119488	0.133993
1	GAG	62	R	69	E	ADAPTED	0.000649486	0.0883554
1	GAG	62	E	69	K	ADAPTED	2.58e-09	3.15e-06
1	GAG	62	E	69	Q	NONADAPTED	2.08e-09	2.62e-06
1	GAG	67	S	69	K	NONADAPTED	0.000152964	0.0319234
1	GAG	67	S	69	Q	ADAPTED	3.04e-07	0.000199764
1	GAG	75	L	69	P	NONADAPTED	0.000109336	0.025048
1	GAG	75	L	69	Q	ADAPTED	0.000129263	0.0281724
1	GAG	90	K	69	N	ADAPTED	0.000382296	0.061185
1	GAG	91	R	69	E	ADAPTED	7.48e-05	0.0185446
1	GAG	93	G	69	K	ADAPTED	0.00122506	0.136296
1	GAG	102	D	69	E	NONADAPTED	0.00103912	0.122899
1	GAG	107	I	69	R	ADAPTED	0.000245487	0.0448847
1	GAG	370	V	69	R	ADAPTED	0.00171371	0.168164
1	GAG	425	E	69	K	ADAPTED	0.00162912	0.162614
1	GAG	427	I	69	P	ADAPTED	0.00188568	0.177968
1	GAG	427	I	69	Q	NONADAPTED	0.000942419	0.114795
1	GAG	473	S	69	P	ADAPTED	0.00211873	0.191875
1	GAG	479	M	69	P	ADAPTED	0.000408262	0.0636513
1	GAG	499	S	69	E	NONADAPTED	0.00112733	0.129605
1	GAG	46	I	70	T	NONADAPTED	0.00033689	0.0561907
1	GAG	12	K	72	S	NONADAPTED	7.91e-06	0.00303916
1	GAG	12	K	72	T	ADAPTED	7.91e-06	0.00303916
1	GAG	46	V	72	S	ADAPTED	3.56e-08	3.11e-05
1	GAG	46	V	72	T	NONADAPTED	3.56e-08	3.11e-05
1	GAG	76	R	72	S	NONADAPTED	4.28e-05	0.0120389
1	GAG	76	R	72	T	ADAPTED	4.28e-05	0.0120389
1	GAG	479	T	72	S	NONADAPTED	0.000445076	0.0673402
1	GAG	479	T	72	T	ADAPTED	0.000445076	0.0673402
1	GAG	113	Q	73	E	NONADAPTED	0.000615654	0.0848575
1	GAG	376	I	73	E	ADAPTED	1.53e-05	0.00532775
1	GAG	75	F	74	E	NONADAPTED	0.000790155	0.101803
1	GAG	389	I	74	E	NONADAPTED	0.00164094	0.163097
1	GAG	482	D	74	G	ADAPTED	0.00206714	0.188678
1	GAG	12	A	75	L	NONADAPTED	0.00178119	0.171818
1	GAG	15	R	75	I	ADAPTED	3.32e-05	0.00987873
1	GAG	15	R	75	L	NONADAPTED	2.91e-05	0.0088771
1	GAG	30	Q	75	F	ADAPTED	0.000220894	0.041601
1	GAG	46	V	75	I	NONADAPTED	2.1e-09	2.63e-06
1	GAG	46	V	75	L	ADAPTED	9.83e-09	1.02e-05
1	GAG	66	S	75	L	NONADAPTED	0.00216018	0.194019
1	GAG	67	A	75	F	ADAPTED	6.16e-11	1.14e-07
1	GAG	67	S	75	L	ADAPTED	1.06e-05	0.00389401
1	GAG	69	P	75	I	ADAPTED	0.000705385	0.093674
1	GAG	76	K	75	F	NONADAPTED	0.000514691	0.0749352
1	GAG	79	Y	75	F	ADAPTED	7.48e-05	0.0185446
1	GAG	79	F	75	L	ADAPTED	0.000607299	0.0840754
1	GAG	91	R	75	I	ADAPTED	0.000354391	0.0579839
1	GAG	386	T	75	I	ADAPTED	0.00172348	0.168708
1	GAG	15	K	76	R	ADAPTED	0.000554169	0.0790393
1	GAG	20	Q	76	K	NONADAPTED	0.000810815	0.103774
1	GAG	24	G	76	K	ADAPTED	0.00146474	0.15185
1	GAG	24	G	76	R	NONADAPTED	0.0007951	0.10218
1	GAG	30	R	76	K	NONADAPTED	5.14e-05	0.0138835
1	GAG	30	R	76	R	ADAPTED	1.02e-05	0.00377729
1	GAG	49	S	76	K	ADAPTED	1.64e-05	0.00557174
1	GAG	49	S	76	R	NONADAPTED	0.000138552	0.0296812
1	GAG	72	S	76	K	ADAPTED	0.00012898	0.0281724
1	GAG	72	S	76	R	NONADAPTED	1.77e-05	0.0058822
1	GAG	75	F	76	K	NONADAPTED	6.84e-06	0.00269055
1	GAG	75	F	76	R	ADAPTED	3.27e-05	0.00977369
1	GAG	95	K	76	K	NONADAPTED	0.00178691	0.171913
1	GAG	105	E	76	Q	NONADAPTED	2.75e-05	0.00849797
1	GAG	123	K	76	K	NONADAPTED	0.00158737	0.1599
1	GAG	123	K	76	R	ADAPTED	0.00202955	0.186698
1	GAG	132	F	76	R	ADAPTED	0.000939589	0.114585
1	GAG	383	P	76	K	ADAPTED	0.000193022	0.0379176
1	GAG	383	P	76	R	NONADAPTED	0.000143359	0.0305009
1	GAG	435	G	76	K	ADAPTED	0.000911144	0.1121
1	GAG	7	I	78	L	NONADAPTED	1.08e-05	0.0039764
1	GAG	7	I	78	V	ADAPTED	7.69e-05	0.0188758
1	GAG	12	K	78	L	ADAPTED	1.38e-05	0.00491374
1	GAG	12	K	78	V	NONADAPTED	3.16e-05	0.00950915
1	GAG	67	A	78	L	NONADAPTED	6.28e-07	0.000363132
1	GAG	67	A	78	V	ADAPTED	1.5e-05	0.00526585
1	GAG	79	Y	78	V	ADAPTED	0.000989551	0.119115
1	GAG	84	T	78	V	ADAPTED	0.000812342	0.103882
1	GAG	124	N	78	V	ADAPTED	0.0010684	0.125163
1	GAG	12	D	79	F	NONADAPTED	0.0012422	0.137578
1	GAG	62	E	79	Y	NONADAPTED	0.00162724	0.162614
1	GAG	62	K	79	Y	NONADAPTED	0.000244255	0.0447573
1	GAG	75	F	79	Y	ADAPTED	0.000461174	0.0690677
1	GAG	86	W	79	F	ADAPTED	0.00171411	0.168164
1	GAG	103	K	79	Y	NONADAPTED	0.00134839	0.144589
1	GAG	108	R	79	H	ADAPTED	5.43e-05	0.0144528
1	GAG	280	A	79	F	NONADAPTED	0.00206731	0.188678
1	GAG	466	G	79	Y	NONADAPTED	0.00116676	0.132113
1	GAG	478	P	79	H	NONADAPTED	0.00224738	0.199261
1	GAG	12	K	81	A	ADAPTED	0.000662099	0.0895855
1	GAG	46	I	81	A	ADAPTED	0.00074391	0.0974487
1	GAG	58	R	81	A	NONADAPTED	0.000532579	0.0767819
1	GAG	58	R	81	T	ADAPTED	0.000578035	0.0810528
1	GAG	84	T	81	A	NONADAPTED	6.23e-08	4.88e-05
1	GAG	84	T	81	T	ADAPTED	3.22e-05	0.00966825
1	GAG	130	Q	81	L	NONADAPTED	0.000887411	0.110313
1	GAG	211	E	81	T	NONADAPTED	0.00198526	0.184109
1	GAG	252	N	81	T	ADAPTED	0.00214512	0.193012
1	GAG	388	K	81	A	ADAPTED	0.000266541	0.0477443
1	GAG	388	K	81	T	NONADAPTED	0.00149214	0.153785
1	GAG	473	S	81	L	ADAPTED	0.000186022	0.03686
1	GAG	51	L	82	V	ADAPTED	1.24e-05	0.0044575
1	GAG	60	I	82	L	NONADAPTED	5.25e-06	0.00217415
1	GAG	60	I	82	V	ADAPTED	1.69e-06	0.000826325
1	GAG	67	A	82	I	NONADAPTED	6.85e-08	5.27e-05
1	GAG	67	A	82	V	ADAPTED	6.08e-08	4.81e-05
1	GAG	76	R	82	I	ADAPTED	0.000107429	0.024718
1	GAG	76	R	82	V	NONADAPTED	1.84e-05	0.0060586
1	GAG	84	V	82	I	ADAPTED	8.64e-14	2.64e-10
1	GAG	84	V	82	V	NONADAPTED	3.13e-14	1.11e-10
1	GAG	95	K	82	I	ADAPTED	0.000897007	0.111011
1	GAG	95	K	82	V	NONADAPTED	0.000581742	0.0814517
1	GAG	62	E	83	A	ADAPTED	0.000407393	0.0635876
1	GAG	91	R	83	A	NONADAPTED	0.000108509	0.0249269
1	GAG	91	R	83	V	ADAPTED	0.000152706	0.0319234
1	GAG	104	I	83	A	ADAPTED	4.18e-06	0.00177824
1	GAG	104	I	83	V	NONADAPTED	1.44e-06	0.000733052
1	GAG	467	E	83	A	ADAPTED	0.00068405	0.0917146
1	GAG	34	V	84	V	ADAPTED	0.000611251	0.0845037
1	GAG	62	G	84	T	NONADAPTED	0.000825425	0.105064
1	GAG	81	A	84	T	NONADAPTED	4.54e-06	0.00191128
1	GAG	81	A	84	V	ADAPTED	1.51e-05	0.00527687
1	GAG	82	V	84	T	ADAPTED	9.09e-06	0.00344146
1	GAG	82	V	84	V	NONADAPTED	3.08e-06	0.0013903
1	GAG	86	F	84	T	NONADAPTED	1.62e-06	0.000800944
1	GAG	86	F	84	V	ADAPTED	1.33e-06	0.00068025
1	GAG	91	G	84	T	ADAPTED	5.62e-05	0.0148305
1	GAG	91	G	84	V	NONADAPTED	0.000539305	0.0774402
1	GAG	94	I	84	V	ADAPTED	7.71e-05	0.0188822
1	GAG	104	I	84	T	NONADAPTED	0.00160678	0.161035
1	GAG	375	N	84	V	NONADAPTED	1.2e-05	0.00433791
1	GAG	401	V	84	T	NONADAPTED	0.000431959	0.0659121
1	GAG	401	V	84	V	ADAPTED	0.000657988	0.0891736
1	GAG	58	Q	86	W	ADAPTED	4.48e-09	5.18e-06
1	GAG	62	E	86	W	ADAPTED	8.02e-05	0.0194855
1	GAG	62	E	86	Y	NONADAPTED	8.3e-07	0.000457528
1	GAG	84	V	86	F	ADAPTED	5.99e-08	4.8e-05
1	GAG	84	T	86	Y	ADAPTED	3.48e-06	0.00153014
1	GAG	107	E	86	Y	ADAPTED	5.62e-05	0.0148305
1	GAG	109	S	86	Y	NONADAPTED	3.68e-05	0.0106987
1	GAG	256	V	86	W	ADAPTED	0.0009768	0.117976
1	GAG	469	I	86	F	ADAPTED	0.000234728	0.0435203
1	GAG	30	M	90	Q	NONADAPTED	0.000876555	0.109506
1	GAG	55	Q	90	E	ADAPTED	0.000972984	0.117834
1	GAG	62	E	90	L	ADAPTED	0.000527159	0.0761757
1	GAG	69	N	90	K	ADAPTED	0.000206251	0.039647
1	GAG	86	Y	90	R	NONADAPTED	0.00108688	0.126344
1	GAG	110	K	90	K	NONADAPTED	5.71e-05	0.0150155
1	GAG	122	K	90	A	ADAPTED	0.000158361	0.0327771
1	GAG	125	D	90	A	ADAPTED	5.37e-06	0.00220901
1	GAG	125	R	90	E	ADAPTED	8.11e-05	0.0196445
1	GAG	146	P	90	L	ADAPTED	0.00122638	0.136296
1	GAG	219	P	90	Q	NONADAPTED	9.34e-05	0.0220568
1	GAG	244	Q	90	Q	ADAPTED	0.0012616	0.139146
1	GAG	292	P	90	Q	ADAPTED	0.00208431	0.189443
1	GAG	292	P	90	R	NONADAPTED	0.00088387	0.110016
1	GAG	362	I	90	R	ADAPTED	0.00213065	0.192176
1	GAG	387	R	90	E	NONADAPTED	0.000283987	0.0496792
1	GAG	10	G	91	K	NONADAPTED	1.89e-16	8.15e-13
1	GAG	10	G	91	R	ADAPTED	2.42e-14	8.92e-11
1	GAG	12	K	91	E	ADAPTED	0.000469784	0.0700644
1	GAG	12	E	91	G	NONADAPTED	3.68e-25	3.08e-21
1	GAG	12	K	91	G	ADAPTED	4.63e-05	0.0127651
1	GAG	12	K	91	K	NONADAPTED	2.76e-39	4.95e-35
1	GAG	12	Q	91	K	NONADAPTED	0.000112828	0.0255678
1	GAG	12	K	91	N	ADAPTED	1.02e-25	8.85e-22
1	GAG	12	K	91	R	NONADAPTED	0.000192527	0.0378501
1	GAG	12	K	91	S	ADAPTED	0.000198165	0.0386255
1	GAG	15	K	91	G	ADAPTED	1.7e-06	0.000827144
1	GAG	15	Q	91	N	NONADAPTED	1.57e-05	0.00540097
1	GAG	15	H	91	R	ADAPTED	0.000341493	0.0565822
1	GAG	15	Q	91	R	ADAPTED	2.62e-08	2.36e-05
1	GAG	15	S	91	R	ADAPTED	0.000899307	0.111241
1	GAG	28	K	91	K	ADAPTED	5.34e-08	4.32e-05
1	GAG	28	K	91	R	NONADAPTED	5.13e-05	0.0138835
1	GAG	45	S	91	K	NONADAPTED	0.00146021	0.151552
1	GAG	49	G	91	K	ADAPTED	0.000521421	0.0755206
1	GAG	49	S	91	R	ADAPTED	0.000370004	0.0596264
1	GAG	54	A	91	Q	ADAPTED	0.000379851	0.0609258
1	GAG	69	E	91	K	NONADAPTED	0.0020215	0.18624
1	GAG	69	E	91	R	ADAPTED	4.45e-05	0.0123694
1	GAG	83	A	91	R	NONADAPTED	0.00157838	0.159501
1	GAG	84	T	91	G	ADAPTED	0.000258193	0.0466302
1	GAG	95	K	91	K	NONADAPTED	1.72e-08	1.64e-05
1	GAG	95	R	91	R	NONADAPTED	4.7e-08	3.9e-05
1	GAG	110	E	91	K	NONADAPTED	0.00197262	0.183617
1	GAG	125	D	91	E	ADAPTED	9.84e-07	0.000530986
1	GAG	126	G	91	R	NONADAPTED	0.000210891	0.0402919
1	GAG	128	V	91	N	NONADAPTED	0.00174854	0.169946
1	GAG	132	F	91	G	ADAPTED	0.00173885	0.169413
1	GAG	138	A	91	R	ADAPTED	5.77e-06	0.00234313
1	GAG	377	M	91	R	ADAPTED	0.000815499	0.104002
1	GAG	401	T	91	R	ADAPTED	0.0015452	0.157301
1	GAG	415	R	91	Q	ADAPTED	6.54e-05	0.0168703
1	GAG	176	A	92	I	NONADAPTED	0.00125757	0.138789
1	GAG	9	S	93	D	ADAPTED	0.00171952	0.168497
1	GAG	11	G	93	K	NONADAPTED	6.42e-06	0.00256859
1	GAG	15	E	93	K	ADAPTED	0.000375819	0.0603948
1	GAG	43	R	93	E	ADAPTED	0.001431	0.149814
1	GAG	58	K	93	E	NONADAPTED	0.00137675	0.145981
1	GAG	94	I	93	D	NONADAPTED	1.42e-09	1.85e-06
1	GAG	94	I	93	E	ADAPTED	1.2e-12	3.11e-09
1	GAG	108	Q	93	D	ADAPTED	0.000164945	0.03375
1	GAG	108	Q	93	E	NONADAPTED	0.00106874	0.125163
1	GAG	113	K	93	Q	NONADAPTED	0.00206587	0.188678
1	GAG	123	G	93	K	NONADAPTED	0.00146655	0.151959
1	GAG	127	P	93	Q	ADAPTED	0.00026468	0.0475279
1	GAG	385	T	93	D	ADAPTED	0.000115911	0.0259829
1	GAG	398	A	93	D	NONADAPTED	0.00158194	0.159566
1	GAG	462	I	93	E	NONADAPTED	0.00107096	0.12519
1	GAG	471	T	93	N	NONADAPTED	0.00165571	0.163973
1	GAG	474	Q	93	A	NONADAPTED	0.000208327	0.0398932
1	GAG	482	E	93	E	ADAPTED	6.87e-05	0.0174966
1	GAG	93	E	94	I	ADAPTED	1.13e-13	3.42e-10
1	GAG	93	E	94	V	NONADAPTED	1.26e-13	3.76e-10
1	GAG	104	V	94	I	NONADAPTED	3.69e-08	3.17e-05
1	GAG	104	V	94	V	ADAPTED	3.65e-08	3.16e-05
1	GAG	120	A	94	I	ADAPTED	0.00128381	0.140312
1	GAG	120	A	94	V	NONADAPTED	0.00128293	0.140312
1	GAG	165	S	94	I	ADAPTED	0.00128552	0.140331
1	GAG	165	S	94	V	NONADAPTED	0.00128495	0.140329
1	GAG	383	V	94	I	ADAPTED	0.00178728	0.171913
1	GAG	383	V	94	V	NONADAPTED	0.00179095	0.172201
1	GAG	471	N	94	I	ADAPTED	0.00182212	0.173953
1	GAG	471	N	94	V	NONADAPTED	0.0018263	0.174263
1	GAG	476	P	94	I	NONADAPTED	0.0012989	0.141323
1	GAG	476	P	94	V	ADAPTED	0.0012952	0.141081
1	GAG	477	G	94	I	NONADAPTED	0.00180121	0.172855
1	GAG	477	G	94	V	ADAPTED	0.001804	0.172991
1	GAG	483	Q	94	I	NONADAPTED	0.000758105	0.0988436
1	GAG	483	Q	94	V	ADAPTED	0.000756926	0.0987412
1	GAG	12	K	95	K	NONADAPTED	0.00150449	0.154612
1	GAG	12	K	95	R	ADAPTED	0.00213277	0.192176
1	GAG	15	E	95	A	ADAPTED	0.000425269	0.0652056
1	GAG	18	G	95	R	ADAPTED	0.00181285	0.173521
1	GAG	20	R	95	K	ADAPTED	0.000204474	0.0394566
1	GAG	20	R	95	R	NONADAPTED	0.000169844	0.0346111
1	GAG	26	K	95	Q	NONADAPTED	0.00132182	0.142925
1	GAG	28	K	95	K	ADAPTED	7.37e-14	2.34e-10
1	GAG	28	K	95	R	NONADAPTED	2.76e-12	6.6e-09
1	GAG	30	R	95	K	NONADAPTED	0.000477138	0.0708243
1	GAG	66	P	95	R	ADAPTED	0.00205794	0.18841
1	GAG	76	K	95	R	ADAPTED	0.000790796	0.101803
1	GAG	82	V	95	K	NONADAPTED	0.00121182	0.135288
1	GAG	91	R	95	K	ADAPTED	3.43e-09	4.09e-06
1	GAG	91	R	95	R	NONADAPTED	6.02e-12	1.32e-08
1	GAG	103	K	95	R	ADAPTED	0.000530152	0.07652
1	GAG	381	G	95	Q	NONADAPTED	4.68e-05	0.012878
1	GAG	28	K	98	Q	NONADAPTED	0.000265535	0.0476475
1	GAG	91	K	98	Q	NONADAPTED	0.00149405	0.153855
1	GAG	102	D	98	K	ADAPTED	1.59e-07	0.000111755
1	GAG	102	D	98	Q	NONADAPTED	8.28e-06	0.00316694
1	GAG	105	K	98	K	NONADAPTED	3.62e-06	0.00157992
1	GAG	105	K	98	Q	ADAPTED	5.21e-05	0.0139996
1	GAG	138	I	98	Q	ADAPTED	0.000281243	0.0494405
1	GAG	219	H	98	Q	ADAPTED	0.00187404	0.177322
1	GAG	62	G	99	E	NONADAPTED	0.000184318	0.0366672
1	GAG	109	S	99	D	ADAPTED	0.000330586	0.0554713
1	GAG	109	S	99	E	NONADAPTED	0.000339054	0.0564767
1	GAG	385	N	99	D	NONADAPTED	0.00116106	0.131732
1	GAG	389	T	99	E	NONADAPTED	0.00212759	0.192176
1	GAG	12	K	102	D	ADAPTED	0.000117295	0.0261607
1	GAG	12	K	102	E	NONADAPTED	0.000567856	0.0803441
1	GAG	18	K	102	D	ADAPTED	0.00220913	0.197214
1	GAG	28	K	102	D	NONADAPTED	2.09e-05	0.00673267
1	GAG	28	K	102	E	ADAPTED	2.61e-05	0.00810894
1	GAG	58	Q	102	E	NONADAPTED	5.71e-06	0.0023342
1	GAG	69	E	102	D	NONADAPTED	0.000468185	0.0699448
1	GAG	82	L	102	D	NONADAPTED	0.00155317	0.157754
1	GAG	98	K	102	D	ADAPTED	2.25e-08	2.09e-05
1	GAG	98	K	102	E	NONADAPTED	0.000987288	0.118924
1	GAG	104	V	102	D	NONADAPTED	5.42e-05	0.0144528
1	GAG	104	V	102	E	ADAPTED	9.41e-05	0.0221504
1	GAG	469	T	102	D	NONADAPTED	0.00159367	0.160409
1	GAG	473	S	102	E	ADAPTED	3.23e-09	3.9e-06
1	GAG	54	T	103	K	NONADAPTED	0.000227551	0.0425491
1	GAG	54	A	103	Q	ADAPTED	0.000455745	0.068418
1	GAG	54	T	103	R	ADAPTED	6.81e-05	0.0173919
1	GAG	61	L	103	K	NONADAPTED	0.00124628	0.137908
1	GAG	61	L	103	R	ADAPTED	0.00118395	0.133364
1	GAG	126	S	103	R	ADAPTED	0.00163793	0.162979
1	GAG	419	D	103	K	NONADAPTED	0.000482598	0.0713812
1	GAG	419	D	103	R	ADAPTED	0.00020553	0.0395689
1	GAG	15	R	104	I	ADAPTED	0.000576141	0.080923
1	GAG	15	K	104	V	ADAPTED	0.00128904	0.140593
1	GAG	67	S	104	I	NONADAPTED	2.45e-05	0.00771911
1	GAG	67	S	104	V	ADAPTED	1.62e-05	0.00551453
1	GAG	83	V	104	I	NONADAPTED	1.85e-05	0.00608494
1	GAG	83	V	104	V	ADAPTED	0.000138522	0.0296812
1	GAG	84	T	104	I	NONADAPTED	1.1e-05	0.00401867
1	GAG	84	T	104	V	ADAPTED	2.75e-06	0.00125772
1	GAG	94	V	104	I	NONADAPTED	0.000629095	0.0863777
1	GAG	94	V	104	V	ADAPTED	6.33e-07	0.000364139
1	GAG	107	A	104	L	ADAPTED	6.11e-05	0.0159762
1	GAG	163	G	104	M	ADAPTED	0.000825548	0.105064
1	GAG	252	S	104	I	NONADAPTED	0.000389114	0.0619742
1	GAG	252	S	104	V	ADAPTED	0.000615058	0.0848218
1	GAG	384	K	104	V	NONADAPTED	0.000652553	0.0886299
1	GAG	385	G	104	L	ADAPTED	1.99e-07	0.000136574
1	GAG	386	Q	104	M	NONADAPTED	5.33e-06	0.00219871
1	GAG	68	L	105	E	ADAPTED	0.000276525	0.0488507
1	GAG	76	Q	105	E	NONADAPTED	4.54e-06	0.00191128
1	GAG	98	K	105	E	ADAPTED	1.59e-06	0.000791253
1	GAG	98	K	105	K	NONADAPTED	3.65e-07	0.000230315
1	GAG	109	N	105	E	ADAPTED	0.00101574	0.121394
1	GAG	109	D	105	K	ADAPTED	0.00124353	0.137664
1	GAG	112	K	105	K	NONADAPTED	0.00184984	0.175907
1	GAG	456	S	106	E	NONADAPTED	0.00014487	0.0307457
1	GAG	58	Q	107	A	ADAPTED	2.78e-07	0.000185124
1	GAG	58	Q	107	E	NONADAPTED	5.06e-07	0.000297519
1	GAG	79	Y	107	I	NONADAPTED	0.000603619	0.0837508
1	GAG	86	W	107	V	ADAPTED	4.96e-07	0.000292005
1	GAG	138	L	107	E	ADAPTED	1.71e-08	1.63e-05
1	GAG	138	A	107	I	ADAPTED	0.00018947	0.0373954
1	GAG	190	I	107	M	ADAPTED	1.13e-07	8.2e-05
1	GAG	441	H	107	I	NONADAPTED	0.00219635	0.196283
1	GAG	483	Q	107	I	ADAPTED	0.00160746	0.161038
1	GAG	487	V	107	V	ADAPTED	0.000390065	0.0620089
1	GAG	62	G	108	K	NONADAPTED	0.000273766	0.0484315
1	GAG	62	G	108	Q	ADAPTED	1.09e-07	7.99e-05
1	GAG	62	E	108	R	ADAPTED	2.74e-05	0.00846532
1	GAG	76	K	108	Q	NONADAPTED	4.86e-05	0.0132862
1	GAG	79	H	108	Q	NONADAPTED	0.000399095	0.0627228
1	GAG	79	H	108	R	ADAPTED	1.27e-06	0.000660949
1	GAG	93	E	108	Q	NONADAPTED	0.00144303	0.15033
1	GAG	223	V	108	R	ADAPTED	0.00101861	0.121562
1	GAG	67	S	109	S	ADAPTED	0.00084159	0.106357
1	GAG	99	D	109	N	NONADAPTED	0.0019513	0.182443
1	GAG	99	D	109	S	ADAPTED	0.000254041	0.0461449
1	GAG	105	K	109	D	ADAPTED	1.41e-05	0.0049983
1	GAG	105	K	109	N	NONADAPTED	0.00128057	0.140156
1	GAG	112	K	109	K	NONADAPTED	1.32e-06	0.000679085
1	GAG	113	Q	109	N	ADAPTED	2.93e-05	0.00893095
1	GAG	219	Q	109	D	ADAPTED	0.00222708	0.198139
1	GAG	223	I	109	K	ADAPTED	0.00134959	0.144619
1	GAG	257	Q	109	T	ADAPTED	0.000493214	0.0722697
1	GAG	463	F	109	K	NONADAPTED	0.000168069	0.0343332
1	GAG	499	S	109	N	NONADAPTED	0.000913022	0.112273
1	GAG	90	K	110	K	NONADAPTED	0.000200956	0.0389576
1	GAG	91	K	110	E	NONADAPTED	0.00110785	0.128013
1	GAG	95	R	110	N	ADAPTED	0.000194076	0.0380352
1	GAG	159	V	110	E	NONADAPTED	0.00102333	0.121836
1	GAG	228	M	110	K	ADAPTED	0.00205118	0.187929
1	GAG	443	G	110	K	ADAPTED	0.000550397	0.0787333
1	GAG	473	T	110	R	ADAPTED	1.79e-05	0.00592857
1	GAG	474	R	110	N	ADAPTED	7.65e-05	0.0188409
1	GAG	482	G	110	K	NONADAPTED	0.000710001	0.0941157
1	GAG	12	E	111	G	NONADAPTED	0.000585193	0.0817875
1	GAG	30	R	111	C	NONADAPTED	0.00072972	0.0962432
1	GAG	62	E	111	C	NONADAPTED	3.47e-06	0.00152797
1	GAG	62	E	111	S	ADAPTED	6.33e-07	0.000364139
1	GAG	110	R	111	C	ADAPTED	0.000308337	0.0526178
1	GAG	256	V	111	I	ADAPTED	0.000782818	0.101016
1	GAG	374	S	111	I	ADAPTED	0.00202029	0.18624
1	GAG	441	Y	111	S	ADAPTED	0.0015987	0.160482
1	GAG	113	K	112	K	ADAPTED	3.31e-05	0.00986983
1	GAG	113	K	112	Q	NONADAPTED	0.00181823	0.173758
1	GAG	126	N	112	R	ADAPTED	0.00101022	0.120996
1	GAG	232	K	112	K	NONADAPTED	0.000710096	0.0941157
1	GAG	112	K	113	Q	NONADAPTED	0.00146803	0.151987
1	GAG	115	A	113	K	ADAPTED	0.000145937	0.0308418
1	GAG	117	K	113	E	ADAPTED	4.34e-05	0.0121842
1	GAG	383	F	113	R	NONADAPTED	0.00201539	0.185872
1	GAG	437	L	113	K	NONADAPTED	0.00165321	0.163855
1	GAG	15	Q	114	N	ADAPTED	0.00198437	0.184094
1	GAG	62	Q	114	Q	ADAPTED	0.0012619	0.139146
1	GAG	113	K	114	A	NONADAPTED	0.00171127	0.168016
1	GAG	113	Q	114	R	NONADAPTED	6.99e-05	0.0177128
1	GAG	248	T	114	K	ADAPTED	0.00207813	0.189224
1	GAG	385	G	114	K	ADAPTED	0.00172215	0.168688
1	GAG	441	S	114	K	NONADAPTED	0.00116306	0.131899
1	GAG	34	L	115	T	ADAPTED	0.000644903	0.0880662
1	GAG	113	K	115	T	NONADAPTED	0.000803886	0.103045
1	GAG	124	N	115	A	ADAPTED	0.000642279	0.0878035
1	GAG	342	S	115	A	NONADAPTED	0.00158781	0.1599
1	GAG	470	A	115	T	NONADAPTED	0.000397801	0.0626433
1	GAG	9	S	116	Q	ADAPTED	0.000113927	0.0257239
1	GAG	90	Q	116	P	NONADAPTED	4.06e-05	0.0116144
1	GAG	252	S	116	P	ADAPTED	0.0012739	0.139854
1	GAG	62	E	117	P	NONADAPTED	0.00222897	0.198139
1	GAG	113	E	117	K	ADAPTED	0.000175254	0.0353688
1	GAG	122	A	117	P	ADAPTED	0.00163454	0.162712
1	GAG	82	I	118	A	ADAPTED	0.0018533	0.176103
1	GAG	119	Q	118	A	NONADAPTED	0.000319376	0.0540337
1	GAG	119	T	118	K	ADAPTED	3.85e-06	0.00166534
1	GAG	119	Q	118	Q	ADAPTED	1.63e-05	0.00552601
1	GAG	244	Q	118	A	ADAPTED	0.00211126	0.191337
1	GAG	374	A	118	A	NONADAPTED	0.00142614	0.149563
1	GAG	90	A	119	K	ADAPTED	0.000379238	0.0608663
1	GAG	118	Q	119	Q	ADAPTED	6.02e-06	0.00242711
1	GAG	118	K	119	T	ADAPTED	4.1e-05	0.0116746
1	GAG	126	K	119	E	ADAPTED	7.76e-05	0.0189941
1	GAG	136	R	119	A	NONADAPTED	0.00212947	0.192176
1	GAG	136	R	119	T	ADAPTED	0.00207561	0.189131
1	GAG	373	T	119	V	ADAPTED	0.000298549	0.0513668
1	GAG	383	V	119	E	ADAPTED	6.95e-05	0.0176778
1	GAG	449	P	119	E	ADAPTED	0.00173423	0.169351
1	GAG	467	F	119	E	ADAPTED	0.000136189	0.029289
1	GAG	484	E	119	K	ADAPTED	0.00104684	0.123579
1	GAG	95	R	120	E	ADAPTED	0.0014341	0.149896
1	GAG	121	S	120	S	ADAPTED	3.64e-08	3.16e-05
1	GAG	224	A	120	A	ADAPTED	8.27e-05	0.0199721
1	GAG	224	P	120	T	ADAPTED	0.000386901	0.0617014
1	GAG	467	F	120	A	NONADAPTED	0.000693458	0.0924817
1	GAG	473	A	120	E	ADAPTED	0.00103421	0.122492
1	GAG	487	I	120	T	ADAPTED	0.00136132	0.145255
1	GAG	12	Q	121	G	NONADAPTED	0.000222565	0.0418215
1	GAG	62	E	121	A	ADAPTED	0.00159686	0.160445
1	GAG	62	G	121	D	ADAPTED	2.51e-05	0.00784387
1	GAG	112	Q	121	D	NONADAPTED	0.000182046	0.0364464
1	GAG	115	E	121	G	ADAPTED	0.000269533	0.0479871
1	GAG	119	K	121	A	ADAPTED	0.00122817	0.136325
1	GAG	120	S	121	S	ADAPTED	1.66e-08	1.59e-05
1	GAG	122	P	121	D	NONADAPTED	0.00116863	0.132113
1	GAG	122	P	121	G	ADAPTED	0.00198328	0.184094
1	GAG	123	A	121	A	ADAPTED	0.000512779	0.0747002
1	GAG	123	R	121	D	ADAPTED	0.000652838	0.0886299
1	GAG	124	N	121	A	NONADAPTED	5.98e-11	1.11e-07
1	GAG	125	S	121	G	ADAPTED	0.000918721	0.112646
1	GAG	128	V	121	D	ADAPTED	6.61e-07	0.000376932
1	GAG	128	A	121	G	ADAPTED	1.01e-07	7.4e-05
1	GAG	173	V	121	A	ADAPTED	0.00051674	0.0751899
1	GAG	373	P	121	A	ADAPTED	0.00167905	0.165631
1	GAG	23	Q	122	A	ADAPTED	0.00019402	0.0380352
1	GAG	23	P	122	T	ADAPTED	0.000562341	0.0797437
1	GAG	90	A	122	K	ADAPTED	1.06e-06	0.000569691
1	GAG	117	P	122	A	ADAPTED	0.00121145	0.135288
1	GAG	119	K	122	D	ADAPTED	0.000188862	0.0373048
1	GAG	123	E	122	K	ADAPTED	0.000124171	0.0273718
1	GAG	123	V	122	Q	ADAPTED	0.00121382	0.13545
1	GAG	124	N	122	A	NONADAPTED	3.32e-07	0.000217169
1	GAG	124	N	122	T	ADAPTED	1.2e-06	0.000629545
1	GAG	124	S	122	T	ADAPTED	3.3e-07	0.000215962
1	GAG	125	G	122	K	ADAPTED	0.000190961	0.0376601
1	GAG	224	A	122	A	ADAPTED	0.000644692	0.0880662
1	GAG	377	L	122	D	ADAPTED	0.00188541	0.177968
1	GAG	442	K	122	K	NONADAPTED	0.000488034	0.0720135
1	GAG	474	L	122	K	ADAPTED	0.00039957	0.062725
1	GAG	15	K	123	K	ADAPTED	0.00102511	0.121932
1	GAG	25	G	123	E	NONADAPTED	0.00150757	0.154677
1	GAG	102	E	123	K	ADAPTED	0.000799498	0.102535
1	GAG	118	K	123	G	NONADAPTED	0.000911166	0.1121
1	GAG	121	A	123	A	ADAPTED	0.000448318	0.0676682
1	GAG	121	G	123	G	ADAPTED	0.00200161	0.185155
1	GAG	121	D	123	R	ADAPTED	0.00194764	0.182237
1	GAG	122	K	123	E	ADAPTED	0.00165561	0.163973
1	GAG	122	T	123	E	NONADAPTED	6.79e-06	0.00267987
1	GAG	122	T	123	G	ADAPTED	0.00056551	0.0801026
1	GAG	122	Q	123	V	ADAPTED	0.00137095	0.14577
1	GAG	124	D	123	A	ADAPTED	9.3e-12	2.03e-08
1	GAG	124	D	123	G	NONADAPTED	4.66e-08	3.9e-05
1	GAG	354	G	123	G	ADAPTED	0.000491683	0.0721995
1	GAG	429	R	123	R	NONADAPTED	0.00183097	0.174576
1	GAG	9	R	124	Q	ADAPTED	0.000309806	0.0527966
1	GAG	46	L	124	N	NONADAPTED	5.36e-05	0.0143127
1	GAG	58	K	124	S	NONADAPTED	0.000156244	0.0324998
1	GAG	119	K	124	A	ADAPTED	2.51e-05	0.00784646
1	GAG	121	A	124	N	NONADAPTED	1.46e-09	1.9e-06
1	GAG	121	G	124	N	ADAPTED	0.000293941	0.0509563
1	GAG	121	A	124	S	ADAPTED	0.000298115	0.0513274
1	GAG	122	T	124	K	NONADAPTED	6.23e-07	0.000360815
1	GAG	122	T	124	N	ADAPTED	5.7e-06	0.00233236
1	GAG	123	A	124	D	ADAPTED	9.42e-12	2.04e-08
1	GAG	123	G	124	D	NONADAPTED	0.00225532	0.199704
1	GAG	123	G	124	G	NONADAPTED	9.44e-05	0.0221504
1	GAG	123	A	124	N	NONADAPTED	0.00136698	0.145549
1	GAG	125	A	124	A	ADAPTED	0.000116353	0.0260142
1	GAG	125	C	124	N	NONADAPTED	0.000678709	0.0913403
1	GAG	125	R	124	Q	ADAPTED	2.88e-06	0.00131068
1	GAG	125	C	124	S	ADAPTED	0.00143887	0.15018
1	GAG	376	I	124	K	NONADAPTED	0.00206745	0.188678
1	GAG	472	S	124	G	ADAPTED	0.00217878	0.195061
1	GAG	61	L	125	D	NONADAPTED	0.00186938	0.177094
1	GAG	90	A	125	D	ADAPTED	6.09e-06	0.00244717
1	GAG	90	Q	125	D	NONADAPTED	0.00144103	0.150246
1	GAG	122	A	125	K	ADAPTED	0.000192279	0.0378501
1	GAG	122	A	125	T	ADAPTED	0.000526092	0.0760654
1	GAG	124	A	125	A	ADAPTED	2.39e-05	0.00754707
1	GAG	124	Q	125	R	ADAPTED	1.34e-05	0.00479092
1	GAG	126	S	125	D	NONADAPTED	7.08e-05	0.017896
1	GAG	126	S	125	R	NONADAPTED	0.000677579	0.0912432
1	GAG	127	Q	125	G	NONADAPTED	9.3e-05	0.0220105
1	GAG	127	P	125	S	NONADAPTED	1.93e-05	0.00632894
1	GAG	138	I	125	T	ADAPTED	0.00224508	0.199149
1	GAG	143	V	125	S	NONADAPTED	0.00135856	0.145151
1	GAG	264	K	125	D	ADAPTED	0.00167616	0.165577
1	GAG	301	F	125	N	NONADAPTED	0.00021475	0.0407343
1	GAG	383	I	125	S	ADAPTED	0.00195217	0.182456
1	GAG	81	T	126	R	NONADAPTED	0.00164231	0.163097
1	GAG	91	R	126	G	NONADAPTED	0.000215981	0.0408907
1	GAG	119	E	126	K	ADAPTED	0.000233907	0.0435203
1	GAG	125	N	126	G	NONADAPTED	0.000238595	0.0440419
1	GAG	125	D	126	S	NONADAPTED	4.4e-05	0.0122621
1	GAG	125	R	126	S	NONADAPTED	0.000234503	0.0435203
1	GAG	127	P	126	N	ADAPTED	0.000188527	0.0372681
1	GAG	127	P	126	S	NONADAPTED	0.00113041	0.129661
1	GAG	127	S	126	V	ADAPTED	6.83e-08	5.27e-05
1	GAG	190	I	126	S	ADAPTED	0.000161131	0.0331317
1	GAG	472	P	126	N	ADAPTED	0.000917358	0.112586
1	GAG	54	A	127	P	NONADAPTED	0.000432295	0.0659233
1	GAG	125	G	127	P	ADAPTED	0.000437475	0.0665513
1	GAG	125	G	127	Q	NONADAPTED	9.22e-05	0.0218723
1	GAG	126	N	127	P	ADAPTED	0.000249645	0.0455124
1	GAG	126	S	127	Q	ADAPTED	4.11e-06	0.00175554
1	GAG	126	V	127	Q	NONADAPTED	5.22e-05	0.0139996
1	GAG	126	V	127	S	ADAPTED	4.39e-08	3.7e-05
1	GAG	138	A	127	S	ADAPTED	0.00087859	0.109706
1	GAG	339	T	127	K	ADAPTED	0.000102436	0.0237932
1	GAG	375	N	127	K	ADAPTED	0.00133896	0.144219
1	GAG	467	F	127	K	ADAPTED	0.00103287	0.122391
1	GAG	487	I	127	K	ADAPTED	0.00107689	0.125589
1	GAG	112	K	128	V	NONADAPTED	0.00195853	0.182711
1	GAG	121	G	128	A	ADAPTED	1.7e-06	0.000827144
1	GAG	121	D	128	V	ADAPTED	7.29e-08	5.55e-05
1	GAG	387	K	128	V	ADAPTED	0.000371753	0.0597935
1	GAG	470	T	128	A	ADAPTED	7.8e-05	0.019071
1	GAG	482	G	128	A	ADAPTED	0.00020871	0.039936
1	GAG	483	L	128	V	ADAPTED	0.000649249	0.0883554
1	GAG	66	P	130	H	NONADAPTED	0.00169043	0.166427
1	GAG	398	E	130	H	NONADAPTED	0.0011457	0.130877
1	GAG	67	S	132	Y	NONADAPTED	0.00167421	0.165479
1	GAG	471	P	132	F	ADAPTED	0.000147856	0.0311424
1	GAG	471	P	132	Y	NONADAPTED	0.000174403	0.0352814
1	GAG	480	D	132	F	ADAPTED	0.00217134	0.194603
1	GAG	15	Q	134	I	NONADAPTED	1.18e-05	0.00427971
1	GAG	144	H	134	I	ADAPTED	1.67e-06	0.000818059
1	GAG	248	D	136	Q	NONADAPTED	8.52e-06	0.00324951
1	GAG	248	D	136	R	ADAPTED	2.88e-06	0.00131068
1	GAG	264	G	136	Q	NONADAPTED	1.58e-08	1.54e-05
1	GAG	264	R	136	Q	ADAPTED	0.000296708	0.0512241
1	GAG	264	G	136	R	ADAPTED	6.09e-09	6.76e-06
1	GAG	264	R	136	R	NONADAPTED	4.93e-05	0.0134666
1	GAG	9	R	138	L	ADAPTED	0.00172394	0.168708
1	GAG	12	E	138	A	NONADAPTED	0.00032787	0.0550891
1	GAG	76	K	138	L	ADAPTED	0.000122339	0.0270154
1	GAG	107	E	138	A	NONADAPTED	0.000303345	0.051978
1	GAG	107	E	138	L	ADAPTED	3.82e-09	4.48e-06
1	GAG	127	S	138	A	ADAPTED	0.00091595	0.112523
1	GAG	143	V	138	S	NONADAPTED	0.000212237	0.040422
1	GAG	146	A	138	V	NONADAPTED	0.00033656	0.056173
1	GAG	148	T	138	M	ADAPTED	0.000910206	0.112092
1	GAG	173	T	138	I	NONADAPTED	0.000152927	0.0319234
1	GAG	182	H	138	S	ADAPTED	2.26e-05	0.00721272
1	GAG	223	I	138	I	NONADAPTED	3.17e-06	0.00142892
1	GAG	248	A	138	A	ADAPTED	0.00223221	0.198357
1	GAG	257	P	138	L	ADAPTED	0.000696364	0.0927214
1	GAG	257	P	138	M	NONADAPTED	0.000107501	0.024718
1	GAG	260	E	138	M	ADAPTED	0.00222801	0.198139
1	GAG	280	A	138	I	ADAPTED	0.00011431	0.025764
1	GAG	385	G	138	M	NONADAPTED	2.86e-05	0.008775
1	GAG	398	E	138	L	NONADAPTED	0.000999114	0.11992
1	GAG	439	S	138	L	ADAPTED	0.000676214	0.0911511
1	GAG	142	M	140	G	ADAPTED	2.13e-06	0.00100251
1	GAG	140	G	142	M	ADAPTED	9.69e-06	0.00361577
1	GAG	147	I	142	M	ADAPTED	0.00204556	0.187689
1	GAG	280	S	142	M	NONADAPTED	0.00110959	0.128152
1	GAG	340	G	142	M	ADAPTED	0.00062909	0.0863777
1	GAG	49	G	143	V	ADAPTED	0.00160354	0.160774
1	GAG	107	E	143	T	NONADAPTED	3.66e-08	3.16e-05
1	GAG	107	E	143	V	ADAPTED	1.83e-05	0.00604223
1	GAG	138	S	143	V	NONADAPTED	4.82e-07	0.000285226
1	GAG	144	H	143	V	ADAPTED	1.65e-06	0.000812707
1	GAG	158	V	143	T	NONADAPTED	0.000222053	0.0417879
1	GAG	182	H	143	I	ADAPTED	1.97e-05	0.0064397
1	GAG	243	L	143	I	NONADAPTED	7.27e-05	0.0181741
1	GAG	357	S	143	V	ADAPTED	0.00207226	0.188963
1	GAG	436	K	143	T	NONADAPTED	0.0012786	0.140063
1	GAG	143	V	144	H	ADAPTED	3.38e-05	0.0100275
1	GAG	143	V	144	Y	NONADAPTED	0.000239504	0.0441772
1	GAG	243	P	144	H	NONADAPTED	1.07e-06	0.000572359
1	GAG	243	P	144	Y	ADAPTED	3.03e-07	0.000199764
1	GAG	146	A	145	Q	ADAPTED	0.00151116	0.154981
1	GAG	46	V	146	S	NONADAPTED	0.000417625	0.0647382
1	GAG	110	N	146	A	NONADAPTED	0.00103503	0.122531
1	GAG	136	Q	146	A	NONADAPTED	0.000956005	0.115967
1	GAG	136	Q	146	P	ADAPTED	0.00109298	0.126877
1	GAG	138	A	146	A	NONADAPTED	0.00132098	0.142896
1	GAG	138	L	146	A	ADAPTED	0.00211963	0.191888
1	GAG	138	V	146	A	NONADAPTED	0.000717652	0.094851
1	GAG	138	V	146	P	ADAPTED	0.00150293	0.154525
1	GAG	143	V	146	S	NONADAPTED	4.37e-05	0.0122433
1	GAG	147	L	146	S	ADAPTED	0.000106079	0.0245032
1	GAG	148	S	146	A	ADAPTED	1.07e-09	1.43e-06
1	GAG	148	S	146	P	NONADAPTED	3.68e-10	5.4e-07
1	GAG	149	A	146	A	NONADAPTED	0.000227624	0.0425491
1	GAG	165	N	146	P	ADAPTED	0.000317015	0.0537695
1	GAG	168	V	146	A	NONADAPTED	0.000568941	0.0804403
1	GAG	168	V	146	P	ADAPTED	0.000339944	0.0564772
1	GAG	176	A	146	A	NONADAPTED	2.27e-07	0.000154942
1	GAG	176	A	146	P	ADAPTED	2.57e-10	4.14e-07
1	GAG	182	Q	146	P	ADAPTED	0.000907307	0.111855
1	GAG	200	M	146	A	NONADAPTED	3.1e-05	0.00933261
1	GAG	200	M	146	P	ADAPTED	0.00116524	0.132027
1	GAG	203	D	146	P	NONADAPTED	0.00147024	0.15209
1	GAG	204	T	146	A	ADAPTED	0.00057416	0.0807474
1	GAG	204	T	146	P	NONADAPTED	0.000317443	0.0538057
1	GAG	211	D	146	A	NONADAPTED	2.41e-07	0.000163586
1	GAG	211	D	146	P	ADAPTED	5.83e-08	4.7e-05
1	GAG	242	N	146	P	ADAPTED	0.000231989	0.0432684
1	GAG	260	E	146	A	ADAPTED	0.000492266	0.0722151
1	GAG	260	E	146	P	NONADAPTED	0.000182618	0.0365026
1	GAG	267	I	146	A	ADAPTED	0.000391706	0.0622304
1	GAG	267	V	146	P	ADAPTED	0.00135599	0.145151
1	GAG	268	L	146	A	NONADAPTED	6.74e-05	0.0172769
1	GAG	268	L	146	P	ADAPTED	0.00068132	0.0915443
1	GAG	280	T	146	P	ADAPTED	0.000767453	0.0995965
1	GAG	12	Q	147	L	NONADAPTED	0.00155442	0.157805
1	GAG	144	H	147	I	ADAPTED	0.000230901	0.0430973
1	GAG	144	H	147	L	NONADAPTED	0.000241626	0.0443728
1	GAG	148	A	147	I	ADAPTED	5.71e-05	0.0150155
1	GAG	148	T	147	I	NONADAPTED	0.000172692	0.0350358
1	GAG	148	A	147	L	NONADAPTED	0.000226098	0.042327
1	GAG	163	A	147	L	NONADAPTED	0.000248328	0.0453382
1	GAG	173	T	147	I	NONADAPTED	0.000413599	0.0643229
1	GAG	173	T	147	L	ADAPTED	4.6e-05	0.0127028
1	GAG	173	V	147	M	ADAPTED	1.55e-05	0.0053746
1	GAG	200	M	147	M	NONADAPTED	6.39e-05	0.0165331
1	GAG	223	F	147	M	ADAPTED	0.0010179	0.121562
1	GAG	228	M	147	I	NONADAPTED	0.00120396	0.13471
1	GAG	242	N	147	M	ADAPTED	0.000244717	0.0448094
1	GAG	248	A	147	I	NONADAPTED	6.42e-05	0.0165831
1	GAG	248	T	147	L	NONADAPTED	0.00149519	0.15391
1	GAG	248	A	147	M	ADAPTED	0.000396937	0.0625806
1	GAG	252	H	147	I	NONADAPTED	3.31e-05	0.00986983
1	GAG	252	H	147	L	ADAPTED	6.64e-06	0.00263967
1	GAG	256	V	147	I	ADAPTED	0.0013462	0.144545
1	GAG	256	V	147	L	NONADAPTED	0.000215643	0.0408575
1	GAG	280	V	147	I	NONADAPTED	0.000909976	0.112092
1	GAG	280	V	147	L	ADAPTED	3.32e-06	0.00148115
1	GAG	331	K	147	L	ADAPTED	0.0004385	0.0666264
1	GAG	340	G	147	I	NONADAPTED	1.41e-08	1.4e-05
1	GAG	340	A	147	L	NONADAPTED	9.73e-08	7.22e-05
1	GAG	373	A	147	V	ADAPTED	7.04e-06	0.00274488
1	GAG	374	G	147	I	NONADAPTED	0.00167718	0.165577
1	GAG	383	F	147	L	NONADAPTED	0.00213099	0.192176
1	GAG	386	P	147	L	NONADAPTED	0.00109447	0.126992
1	GAG	389	N	147	M	ADAPTED	6.59e-05	0.0169609
1	GAG	437	V	147	I	NONADAPTED	0.000356052	0.0581496
1	GAG	437	I	147	L	NONADAPTED	0.000430573	0.0658207
1	GAG	465	M	147	I	NONADAPTED	0.000359013	0.0584911
1	GAG	469	K	147	I	NONADAPTED	0.00136678	0.145549
1	GAG	124	N	148	S	NONADAPTED	0.000311591	0.0530289
1	GAG	146	P	148	A	ADAPTED	0.0002442	0.0447573
1	GAG	146	P	148	S	NONADAPTED	3.21e-10	4.83e-07
1	GAG	146	P	148	T	ADAPTED	7.22e-07	0.000404745
1	GAG	147	I	148	T	NONADAPTED	1.65e-05	0.00557579
1	GAG	280	T	148	A	ADAPTED	4.72e-07	0.000280601
1	GAG	147	M	149	A	ADAPTED	6.26e-05	0.0162453
1	GAG	147	M	149	P	NONADAPTED	5.12e-05	0.0138732
1	GAG	483	M	149	A	ADAPTED	0.000383508	0.0613163
1	GAG	483	M	149	P	NONADAPTED	0.000359075	0.0584911
1	GAG	495	N	149	A	NONADAPTED	0.000534764	0.0770203
1	GAG	495	N	149	P	ADAPTED	0.000753055	0.0984411
1	GAG	86	W	158	A	ADAPTED	9.85e-05	0.0229964
1	GAG	86	W	158	V	NONADAPTED	9.86e-05	0.0230152
1	GAG	94	V	158	A	NONADAPTED	0.00224213	0.198957
1	GAG	94	V	158	V	ADAPTED	0.00224196	0.198957
1	GAG	110	E	159	I	ADAPTED	6.72e-06	0.0026551
1	GAG	110	E	159	V	NONADAPTED	6.72e-06	0.0026551
1	GAG	147	M	159	I	ADAPTED	0.000117378	0.0261607
1	GAG	147	M	159	V	NONADAPTED	0.000117378	0.0261607
1	GAG	173	T	159	I	ADAPTED	7.2e-09	7.75e-06
1	GAG	173	T	159	V	NONADAPTED	7.2e-09	7.75e-06
1	GAG	176	S	159	I	ADAPTED	6.21e-05	0.0161502
1	GAG	176	S	159	V	NONADAPTED	6.21e-05	0.0161502
1	GAG	207	D	159	I	ADAPTED	1.11e-07	8.07e-05
1	GAG	207	D	159	V	NONADAPTED	1.11e-07	8.07e-05
1	GAG	273	I	159	I	ADAPTED	7.38e-05	0.0183743
1	GAG	273	I	159	V	NONADAPTED	7.38e-05	0.0183743
1	GAG	280	I	159	I	ADAPTED	1.63e-08	1.58e-05
1	GAG	280	V	159	I	ADAPTED	3.01e-34	3.78e-30
1	GAG	280	I	159	V	NONADAPTED	1.63e-08	1.58e-05
1	GAG	280	V	159	V	NONADAPTED	3.01e-34	3.78e-30
1	GAG	312	E	159	I	ADAPTED	4.95e-08	4.06e-05
1	GAG	312	E	159	V	NONADAPTED	4.95e-08	4.06e-05
1	GAG	339	T	159	I	NONADAPTED	4.96e-08	4.06e-05
1	GAG	339	T	159	V	ADAPTED	4.96e-08	4.06e-05
1	GAG	348	T	159	I	ADAPTED	0.00070239	0.0933257
1	GAG	348	T	159	V	NONADAPTED	0.00070239	0.0933257
1	GAG	15	K	161	D	ADAPTED	0.000813885	0.103902
1	GAG	146	P	161	D	ADAPTED	0.000929044	0.113741
1	GAG	173	T	161	D	ADAPTED	0.000175744	0.0354393
1	GAG	173	T	161	E	NONADAPTED	0.000766539	0.0995445
1	GAG	280	V	161	D	ADAPTED	0.000975509	0.117882
1	GAG	280	T	161	E	ADAPTED	0.000333561	0.0558583
1	GAG	417	R	161	E	NONADAPTED	7.7e-06	0.00296905
1	GAG	357	S	162	K	NONADAPTED	0.000371616	0.0597935
1	GAG	357	S	162	R	ADAPTED	0.000367861	0.0593822
1	GAG	55	E	163	N	NONADAPTED	0.00221756	0.197648
1	GAG	138	L	163	N	NONADAPTED	4.07e-05	0.0116334
1	GAG	148	T	163	A	NONADAPTED	7.12e-06	0.00277471
1	GAG	165	N	163	A	NONADAPTED	1.46e-05	0.00514237
1	GAG	165	S	163	G	NONADAPTED	3.47e-10	5.15e-07
1	GAG	190	I	163	G	ADAPTED	0.00028811	0.0503301
1	GAG	191	V	163	A	ADAPTED	1.25e-06	0.000652323
1	GAG	191	V	163	N	NONADAPTED	3.22e-06	0.00144377
1	GAG	163	G	165	N	ADAPTED	2.26e-06	0.00105292
1	GAG	163	G	165	S	NONADAPTED	2.63e-09	3.2e-06
1	GAG	173	A	165	N	ADAPTED	0.000111933	0.0254794
1	GAG	173	A	165	S	NONADAPTED	0.000217916	0.0412259
1	GAG	252	S	165	N	ADAPTED	0.00014877	0.0312824
1	GAG	252	S	165	S	NONADAPTED	0.000150321	0.0315028
1	GAG	389	I	165	N	ADAPTED	0.000695548	0.0927112
1	GAG	123	G	168	I	NONADAPTED	0.00035025	0.0576903
1	GAG	123	G	168	V	ADAPTED	0.000502638	0.0733507
1	GAG	159	V	168	I	NONADAPTED	5.19e-05	0.0139648
1	GAG	159	V	168	V	ADAPTED	8.65e-05	0.0207865
1	GAG	58	Q	173	S	ADAPTED	0.00140402	0.147721
1	GAG	69	K	173	S	ADAPTED	0.000335073	0.0559653
1	GAG	69	K	173	T	NONADAPTED	0.00204221	0.187518
1	GAG	104	V	173	V	ADAPTED	0.000787083	0.101462
1	GAG	147	I	173	A	ADAPTED	0.000732838	0.096487
1	GAG	147	L	173	S	NONADAPTED	0.000480442	0.0711407
1	GAG	147	L	173	T	ADAPTED	0.000876538	0.109506
1	GAG	147	M	173	T	NONADAPTED	0.000135088	0.0291186
1	GAG	211	D	173	S	ADAPTED	6.96e-06	0.00272421
1	GAG	211	D	173	T	NONADAPTED	4.03e-05	0.0115537
1	GAG	215	T	173	S	NONADAPTED	0.000990052	0.119118
1	GAG	215	M	173	T	NONADAPTED	0.00140445	0.147721
1	GAG	239	T	173	S	NONADAPTED	0.000338029	0.0563433
1	GAG	252	S	173	S	NONADAPTED	4.56e-05	0.0126232
1	GAG	252	S	173	T	ADAPTED	0.000158901	0.0328587
1	GAG	256	I	173	A	NONADAPTED	0.00022322	0.0419132
1	GAG	256	T	173	A	ADAPTED	8.37e-10	1.14e-06
1	GAG	256	V	173	A	NONADAPTED	0.000157963	0.0327465
1	GAG	256	I	173	S	ADAPTED	8.32e-08	6.27e-05
1	GAG	256	V	173	T	ADAPTED	2.71e-05	0.00838699
1	GAG	256	V	173	V	ADAPTED	0.000143817	0.0305481
1	GAG	257	P	173	A	NONADAPTED	1.79e-07	0.000124878
1	GAG	257	P	173	S	ADAPTED	0.000521163	0.0755206
1	GAG	264	K	173	A	ADAPTED	2.82e-36	4.16e-32
1	GAG	264	K	173	I	ADAPTED	1.51e-06	0.000758817
1	GAG	264	K	173	S	NONADAPTED	4.31e-24	3.38e-20
1	GAG	264	R	173	T	ADAPTED	7.01e-06	0.00273837
1	GAG	267	I	173	S	ADAPTED	2.18e-09	2.72e-06
1	GAG	267	V	173	T	ADAPTED	1.21e-07	8.69e-05
1	GAG	267	V	173	V	ADAPTED	1.8e-09	2.29e-06
1	GAG	280	A	173	T	ADAPTED	0.000467146	0.0698652
1	GAG	286	R	173	T	NONADAPTED	0.000603269	0.0837485
1	GAG	312	D	173	T	ADAPTED	0.000949619	0.115367
1	GAG	331	K	173	S	ADAPTED	4.33e-07	0.000264035
1	GAG	331	K	173	T	NONADAPTED	1.62e-06	0.000800944
1	GAG	335	R	173	S	NONADAPTED	0.00133403	0.143936
1	GAG	335	R	173	T	ADAPTED	0.00106822	0.125163
1	GAG	342	S	173	S	NONADAPTED	0.00185819	0.176338
1	GAG	380	N	173	T	ADAPTED	0.00105653	0.12414
1	GAG	401	I	173	T	ADAPTED	0.00095475	0.115871
1	GAG	460	A	173	T	NONADAPTED	0.000577344	0.0810012
1	GAG	466	V	173	S	NONADAPTED	0.00208034	0.189288
1	GAG	92	I	176	A	NONADAPTED	0.00195511	0.182533
1	GAG	92	I	176	S	ADAPTED	0.00195517	0.182533
1	GAG	146	P	176	A	ADAPTED	6.65e-09	7.26e-06
1	GAG	146	P	176	S	NONADAPTED	6.58e-09	7.2e-06
1	GAG	173	S	176	A	ADAPTED	1.54e-08	1.52e-05
1	GAG	173	S	176	S	NONADAPTED	1.57e-08	1.54e-05
1	GAG	260	D	176	A	NONADAPTED	0.000453251	0.068211
1	GAG	260	D	176	S	ADAPTED	0.000453877	0.068252
1	GAG	28	R	182	S	ADAPTED	0.000585556	0.0817875
1	GAG	138	S	182	H	ADAPTED	1.29e-07	9.25e-05
1	GAG	138	S	182	Q	NONADAPTED	1.76e-05	0.00586883
1	GAG	260	D	182	S	ADAPTED	0.00208742	0.189519
1	GAG	260	D	182	T	ADAPTED	0.00130178	0.14149
1	GAG	280	V	182	T	ADAPTED	0.00182774	0.174335
1	GAG	340	G	182	G	ADAPTED	0.00144616	0.150593
1	GAG	483	M	182	T	ADAPTED	0.000324817	0.0547596
1	GAG	76	Q	186	T	NONADAPTED	0.000101921	0.0236955
1	GAG	190	T	186	M	NONADAPTED	5.85e-10	8.33e-07
1	GAG	190	T	186	T	ADAPTED	9.13e-07	0.000496577
1	GAG	357	S	186	L	ADAPTED	0.000473877	0.0705071
1	GAG	357	S	186	T	NONADAPTED	1.24e-05	0.00448053
1	GAG	109	N	190	I	ADAPTED	0.00217014	0.194565
1	GAG	163	G	190	I	ADAPTED	0.00061236	0.0845428
1	GAG	168	I	190	T	NONADAPTED	0.00200836	0.185429
1	GAG	186	M	190	I	ADAPTED	4.62e-08	3.88e-05
1	GAG	186	M	190	T	NONADAPTED	1.54e-08	1.52e-05
1	GAG	470	I	190	I	ADAPTED	0.00222178	0.197851
1	GAG	470	I	190	T	NONADAPTED	0.000701443	0.0932986
1	GAG	163	N	191	I	ADAPTED	3.62e-06	0.00157992
1	GAG	163	N	191	V	NONADAPTED	3.62e-06	0.00157992
1	GAG	147	I	200	I	NONADAPTED	0.000431829	0.0659121
1	GAG	248	G	200	I	ADAPTED	0.000267819	0.0477912
1	GAG	264	K	200	I	ADAPTED	0.000686655	0.0918674
1	GAG	264	R	200	M	ADAPTED	0.000339948	0.0564772
1	GAG	348	A	200	M	NONADAPTED	0.000176413	0.0355456
1	GAG	120	A	203	V	NONADAPTED	0.000110296	0.025222
1	GAG	301	F	203	D	ADAPTED	8.27e-10	1.13e-06
1	GAG	301	F	203	E	NONADAPTED	3.16e-10	4.8e-07
1	GAG	312	D	203	D	ADAPTED	6.5e-07	0.000372498
1	GAG	312	D	203	E	NONADAPTED	4.94e-08	4.06e-05
1	GAG	146	P	204	A	ADAPTED	0.000388875	0.0619742
1	GAG	146	P	211	D	ADAPTED	1.86e-06	0.000892704
1	GAG	146	P	211	E	NONADAPTED	1.98e-06	0.000946389
1	GAG	168	I	211	D	ADAPTED	0.000389352	0.0619742
1	GAG	168	I	211	E	NONADAPTED	0.000389801	0.0620063
1	GAG	173	S	211	D	ADAPTED	5.09e-05	0.0137968
1	GAG	173	S	211	E	NONADAPTED	5.14e-05	0.0138835
1	GAG	200	I	211	D	ADAPTED	0.00212363	0.192096
1	GAG	200	I	211	E	NONADAPTED	0.00212523	0.192096
1	GAG	215	T	211	D	ADAPTED	0.00207955	0.189284
1	GAG	215	T	211	E	NONADAPTED	0.00208847	0.189546
1	GAG	252	H	211	D	NONADAPTED	0.00185711	0.176331
1	GAG	252	H	211	E	ADAPTED	0.00188244	0.177861
1	GAG	280	A	211	D	ADAPTED	0.000193251	0.0379329
1	GAG	280	A	211	E	NONADAPTED	0.000195003	0.0381871
1	GAG	369	Q	211	D	ADAPTED	0.00149042	0.153675
1	GAG	369	Q	211	E	NONADAPTED	0.00149046	0.153675
1	GAG	398	V	211	D	ADAPTED	0.000172905	0.0350358
1	GAG	398	V	211	E	NONADAPTED	0.00017468	0.0352814
1	GAG	454	E	211	D	NONADAPTED	0.00134184	0.144405
1	GAG	454	E	211	E	ADAPTED	0.00134248	0.144413
1	GAG	1	I	212	W	NONADAPTED	3.99e-08	3.38e-05
1	GAG	54	A	215	M	ADAPTED	0.00176013	0.170676
1	GAG	61	L	215	M	ADAPTED	0.000903569	0.111548
1	GAG	111	C	215	M	ADAPTED	0.0019288	0.180744
1	GAG	186	T	215	T	NONADAPTED	0.00107402	0.125469
1	GAG	219	H	215	L	NONADAPTED	2.14e-05	0.00683727
1	GAG	223	V	215	L	NONADAPTED	0.000887926	0.110323
1	GAG	242	T	215	V	ADAPTED	0.00181731	0.173736
1	GAG	248	A	215	L	ADAPTED	0.000392351	0.0622867
1	GAG	248	G	215	V	ADAPTED	2.23e-06	0.00103991
1	GAG	252	S	215	M	ADAPTED	1.48e-05	0.00519768
1	GAG	264	K	215	M	ADAPTED	0.000394484	0.0623952
1	GAG	268	M	215	L	ADAPTED	1.19e-06	0.000622026
1	GAG	268	L	215	V	ADAPTED	2.37e-07	0.000160788
1	GAG	280	A	215	L	ADAPTED	0.000606517	0.0840599
1	GAG	374	P	215	V	NONADAPTED	0.00137577	0.145981
1	GAG	471	A	215	L	ADAPTED	0.0015677	0.158831
1	GAG	471	A	215	V	NONADAPTED	0.00118914	0.133648
1	GAG	481	E	215	M	ADAPTED	0.000457555	0.0686076
1	GAG	46	L	218	I	ADAPTED	0.000266836	0.0477443
1	GAG	54	P	218	V	NONADAPTED	0.000864426	0.108804
1	GAG	91	E	218	V	NONADAPTED	0.000141718	0.0302302
1	GAG	111	I	218	A	ADAPTED	5.81e-05	0.0152534
1	GAG	219	Q	218	A	ADAPTED	5.56e-29	5.81e-25
1	GAG	219	Q	218	P	ADAPTED	1.46e-19	8.71e-16
1	GAG	219	Q	218	V	NONADAPTED	1.21e-42	2.53e-38
1	GAG	223	F	218	A	ADAPTED	0.000589026	0.082135
1	GAG	223	L	218	V	NONADAPTED	0.00036484	0.0590848
1	GAG	248	T	218	P	ADAPTED	1.66e-06	0.000815192
1	GAG	248	T	218	V	NONADAPTED	9.1e-06	0.00344146
1	GAG	260	E	218	P	ADAPTED	0.000416127	0.0645566
1	GAG	427	D	218	A	ADAPTED	0.000119776	0.0265663
1	GAG	479	T	218	V	ADAPTED	0.000353668	0.0579839
1	GAG	90	Q	219	P	NONADAPTED	1.13e-05	0.0041163
1	GAG	138	L	219	H	ADAPTED	0.00204912	0.187878
1	GAG	148	A	219	H	NONADAPTED	0.00026761	0.0477912
1	GAG	148	A	219	Q	ADAPTED	6.18e-06	0.00247867
1	GAG	173	A	219	Q	NONADAPTED	0.00167695	0.165577
1	GAG	215	L	219	H	NONADAPTED	6.02e-07	0.000349476
1	GAG	215	L	219	Q	ADAPTED	0.00215999	0.194019
1	GAG	218	V	219	H	ADAPTED	2.55e-35	3.55e-31
1	GAG	218	V	219	Q	NONADAPTED	1.63e-36	2.56e-32
1	GAG	223	V	219	H	NONADAPTED	3.17e-17	1.45e-13
1	GAG	223	V	219	Q	ADAPTED	3.09e-13	8.8e-10
1	GAG	228	M	219	H	ADAPTED	3.57e-19	1.95e-15
1	GAG	228	M	219	Q	NONADAPTED	5.21e-19	2.72e-15
1	GAG	230	D	219	H	NONADAPTED	1.74e-05	0.00582243
1	GAG	230	D	219	P	ADAPTED	7.85e-10	1.09e-06
1	GAG	248	T	219	H	NONADAPTED	7.25e-07	0.000404851
1	GAG	248	T	219	Q	ADAPTED	9.06e-07	0.000495069
1	GAG	252	S	219	H	NONADAPTED	1.06e-08	1.09e-05
1	GAG	252	N	219	Q	NONADAPTED	3.65e-10	5.39e-07
1	GAG	252	S	219	Q	ADAPTED	0.00140042	0.147515
1	GAG	310	S	219	H	NONADAPTED	3.79e-05	0.0109613
1	GAG	310	S	219	Q	ADAPTED	7.51e-05	0.0185896
1	GAG	398	E	219	P	NONADAPTED	0.00016038	0.0330313
1	GAG	108	R	223	I	NONADAPTED	0.00184948	0.175907
1	GAG	108	Q	223	V	NONADAPTED	0.000770276	0.0999112
1	GAG	119	E	223	A	ADAPTED	0.000173231	0.0350735
1	GAG	136	Q	223	I	NONADAPTED	0.00162852	0.162614
1	GAG	138	L	223	N	ADAPTED	4.38e-05	0.0122496
1	GAG	159	V	223	V	NONADAPTED	0.000882333	0.1099
1	GAG	218	A	223	F	ADAPTED	3.55e-05	0.0103884
1	GAG	218	V	223	L	NONADAPTED	1.96e-05	0.00640829
1	GAG	218	V	223	V	ADAPTED	0.000685583	0.091773
1	GAG	219	H	223	I	ADAPTED	1.79e-06	0.00086502
1	GAG	219	H	223	V	NONADAPTED	4.64e-11	8.95e-08
1	GAG	224	P	223	F	ADAPTED	2.09e-05	0.00674344
1	GAG	224	P	223	N	ADAPTED	9.08e-08	6.8e-05
1	GAG	224	A	223	V	ADAPTED	1.63e-09	2.1e-06
1	GAG	228	L	223	I	NONADAPTED	0.000135552	0.0291881
1	GAG	228	L	223	P	ADAPTED	4.79e-06	0.00199805
1	GAG	230	E	223	I	ADAPTED	0.000559694	0.0795422
1	GAG	230	E	223	V	NONADAPTED	2.5e-05	0.00784387
1	GAG	247	V	223	I	ADAPTED	0.000824827	0.105064
1	GAG	248	T	223	I	ADAPTED	1.47e-09	1.9e-06
1	GAG	248	T	223	V	NONADAPTED	1.14e-06	0.000597844
1	GAG	252	S	223	A	ADAPTED	0.000457023	0.0685687
1	GAG	252	S	223	I	NONADAPTED	1.07e-10	1.88e-07
1	GAG	252	S	223	T	ADAPTED	0.000128996	0.0281724
1	GAG	465	M	223	I	ADAPTED	0.000297865	0.0513195
1	GAG	487	V	223	I	ADAPTED	6.76e-07	0.000383799
1	GAG	487	V	223	V	NONADAPTED	0.000171671	0.0348703
1	GAG	31	M	224	P	ADAPTED	0.00085965	0.108366
1	GAG	223	I	224	A	ADAPTED	1.51e-05	0.00526962
1	GAG	223	N	224	A	NONADAPTED	3.09e-11	6.11e-08
1	GAG	223	V	224	A	ADAPTED	4.63e-05	0.0127705
1	GAG	223	F	224	P	ADAPTED	0.001049	0.123718
1	GAG	223	N	224	P	ADAPTED	1.73e-11	3.56e-08
1	GAG	223	V	224	P	NONADAPTED	7.18e-05	0.0180153
1	GAG	488	A	224	A	NONADAPTED	0.000364834	0.0590848
1	GAG	488	A	224	P	ADAPTED	6.42e-05	0.0165831
1	GAG	26	K	228	M	ADAPTED	0.000395025	0.0624326
1	GAG	107	E	228	I	NONADAPTED	0.00065327	0.0886299
1	GAG	107	V	228	L	ADAPTED	0.00148716	0.153461
1	GAG	107	V	228	M	NONADAPTED	1.97e-05	0.0064397
1	GAG	148	A	228	L	ADAPTED	0.000140944	0.0301164
1	GAG	148	A	228	M	NONADAPTED	0.00150545	0.154612
1	GAG	218	A	228	V	ADAPTED	3.98e-06	0.00171357
1	GAG	219	H	228	I	NONADAPTED	9.69e-13	2.58e-09
1	GAG	219	H	228	M	ADAPTED	8.45e-38	1.41e-33
1	GAG	223	I	228	L	NONADAPTED	3.71e-07	0.000232188
1	GAG	223	P	228	L	ADAPTED	4.17e-05	0.0118022
1	GAG	223	P	228	M	NONADAPTED	3.49e-05	0.0102883
1	GAG	242	T	228	L	NONADAPTED	4.32e-05	0.0121345
1	GAG	248	G	228	I	NONADAPTED	6.07e-19	3.11e-15
1	GAG	248	T	228	I	ADAPTED	2.09e-45	5.24e-41
1	GAG	248	G	228	M	ADAPTED	2.09e-45	5.24e-41
1	GAG	248	A	228	V	ADAPTED	1.52e-06	0.00076357
1	GAG	252	H	228	L	ADAPTED	2.74e-07	0.00018312
1	GAG	256	V	228	M	ADAPTED	0.000110984	0.025356
1	GAG	264	R	228	M	NONADAPTED	0.000549968	0.0787333
1	GAG	371	Q	228	I	NONADAPTED	7.13e-05	0.0179334
1	GAG	375	N	228	V	ADAPTED	0.00137254	0.145833
1	GAG	473	A	228	M	ADAPTED	0.00145286	0.151039
1	GAG	219	H	230	D	NONADAPTED	9.64e-22	6.71e-18
1	GAG	219	P	230	D	ADAPTED	0.000158083	0.0327465
1	GAG	219	H	230	E	ADAPTED	1.42e-21	9.66e-18
1	GAG	219	P	230	E	NONADAPTED	0.000131286	0.0284869
1	GAG	223	V	230	D	ADAPTED	2.31e-05	0.00730571
1	GAG	223	V	230	E	NONADAPTED	1.26e-05	0.00451937
1	GAG	242	T	230	D	ADAPTED	0.00116365	0.131907
1	GAG	242	T	230	E	NONADAPTED	0.00126446	0.139366
1	GAG	260	E	230	D	ADAPTED	0.00177884	0.17176
1	GAG	260	E	230	E	NONADAPTED	0.00163172	0.162624
1	GAG	112	K	232	K	NONADAPTED	0.00113911	0.130421
1	GAG	248	R	232	R	NONADAPTED	0.000447614	0.0676425
1	GAG	354	R	232	K	ADAPTED	3.67e-05	0.0106674
1	GAG	252	S	239	T	NONADAPTED	0.00170536	0.167502
1	GAG	264	K	239	V	ADAPTED	3.37e-06	0.00148783
1	GAG	384	K	239	T	NONADAPTED	0.00139045	0.146989
1	GAG	109	N	242	N	NONADAPTED	0.00152469	0.155986
1	GAG	219	H	242	N	NONADAPTED	0.00166314	0.164515
1	GAG	292	S	242	N	ADAPTED	0.000884681	0.110029
1	GAG	292	S	242	T	NONADAPTED	0.0013735	0.145873
1	GAG	373	S	242	S	NONADAPTED	0.000852532	0.107631
1	GAG	469	E	242	T	ADAPTED	0.00197976	0.184075
1	GAG	473	A	242	N	NONADAPTED	0.000569177	0.0804403
1	GAG	144	Y	243	L	NONADAPTED	2.42e-07	0.000163586
1	GAG	144	Y	243	P	ADAPTED	2.46e-07	0.000165585
1	GAG	497	L	243	L	NONADAPTED	0.000638809	0.0874245
1	GAG	248	G	244	Q	ADAPTED	0.000293338	0.0509242
1	GAG	248	G	247	V	NONADAPTED	0.000367257	0.0593611
1	GAG	252	G	247	I	NONADAPTED	5.23e-05	0.0140057
1	GAG	252	S	247	I	NONADAPTED	0.000244926	0.0448148
1	GAG	252	S	247	V	ADAPTED	0.000251834	0.045878
1	GAG	370	M	247	I	NONADAPTED	0.000744476	0.097472
1	GAG	372	Q	247	I	NONADAPTED	0.00098749	0.118924
1	GAG	418	R	247	I	NONADAPTED	0.00194275	0.181847
1	GAG	30	M	248	T	ADAPTED	3.28e-06	0.00146532
1	GAG	60	I	248	G	NONADAPTED	0.00105112	0.123851
1	GAG	84	V	248	Q	ADAPTED	0.0013414	0.144405
1	GAG	107	E	248	A	ADAPTED	7.17e-05	0.0180019
1	GAG	136	R	248	D	ADAPTED	2.13e-05	0.00682127
1	GAG	136	R	248	G	NONADAPTED	2.16e-06	0.00101261
1	GAG	147	I	248	A	NONADAPTED	0.000475326	0.0706389
1	GAG	200	I	248	A	NONADAPTED	0.00112608	0.129521
1	GAG	215	M	248	A	NONADAPTED	0.00168716	0.166169
1	GAG	218	P	248	A	NONADAPTED	2.45e-06	0.00113371
1	GAG	219	H	248	T	NONADAPTED	3.98e-07	0.000246608
1	GAG	228	M	248	A	NONADAPTED	2.11e-05	0.00679774
1	GAG	228	V	248	A	ADAPTED	0.00075027	0.0981282
1	GAG	228	I	248	G	NONADAPTED	1.07e-05	0.00394124
1	GAG	228	M	248	G	ADAPTED	3.3e-42	6.37e-38
1	GAG	228	I	248	T	ADAPTED	2.09e-45	5.24e-41
1	GAG	232	R	248	R	NONADAPTED	0.000126479	0.0277828
1	GAG	242	T	248	A	NONADAPTED	8.9e-11	1.62e-07
1	GAG	252	H	248	T	NONADAPTED	3.42e-10	5.1e-07
1	GAG	256	V	248	A	ADAPTED	2.26e-08	2.09e-05
1	GAG	256	I	248	G	ADAPTED	6.94e-08	5.33e-05
1	GAG	260	E	248	A	NONADAPTED	0.000325746	0.0548514
1	GAG	264	G	248	A	ADAPTED	0.00112879	0.129661
1	GAG	286	K	248	D	ADAPTED	0.000117426	0.0261607
1	GAG	362	V	248	G	NONADAPTED	0.00197228	0.183617
1	GAG	369	Q	248	R	NONADAPTED	0.000127977	0.0280138
1	GAG	382	N	248	G	NONADAPTED	0.000306169	0.0523191
1	GAG	385	N	248	R	NONADAPTED	0.00113545	0.130121
1	GAG	469	I	248	G	ADAPTED	4.02e-06	0.0017246
1	GAG	478	T	248	D	ADAPTED	0.00122622	0.136296
1	GAG	214	K	249	W	NONADAPTED	5.49e-05	0.0145524
1	GAG	28	T	252	N	ADAPTED	0.00107535	0.125469
1	GAG	58	Q	252	S	ADAPTED	6.63e-05	0.0170371
1	GAG	83	V	252	N	ADAPTED	0.000326552	0.0549044
1	GAG	104	I	252	N	ADAPTED	0.00194033	0.181689
1	GAG	120	A	252	G	NONADAPTED	0.00217638	0.194985
1	GAG	127	Q	252	S	ADAPTED	0.00207515	0.189131
1	GAG	147	L	252	H	ADAPTED	0.00046098	0.0690677
1	GAG	147	L	252	N	NONADAPTED	0.000557458	0.0794104
1	GAG	173	S	252	N	ADAPTED	3.32e-06	0.00148115
1	GAG	173	S	252	S	NONADAPTED	2.06e-08	1.93e-05
1	GAG	211	D	252	H	NONADAPTED	0.00127294	0.13981
1	GAG	215	M	252	N	NONADAPTED	4.39e-05	0.0122591
1	GAG	215	M	252	S	ADAPTED	3.66e-05	0.0106651
1	GAG	218	P	252	H	NONADAPTED	0.00184008	0.175245
1	GAG	218	P	252	S	ADAPTED	0.000159545	0.0329134
1	GAG	219	Q	252	N	NONADAPTED	2.84e-13	8.18e-10
1	GAG	219	Q	252	S	ADAPTED	2.82e-14	1.01e-10
1	GAG	223	I	252	S	NONADAPTED	5.77e-13	1.57e-09
1	GAG	223	T	252	S	ADAPTED	0.000932581	0.114063
1	GAG	228	M	252	H	NONADAPTED	2.3e-08	2.12e-05
1	GAG	228	M	252	S	ADAPTED	0.000553563	0.0790351
1	GAG	230	D	252	N	NONADAPTED	0.000677624	0.0912432
1	GAG	247	I	252	S	NONADAPTED	1.25e-05	0.00448502
1	GAG	248	G	252	G	NONADAPTED	0.000353002	0.0579533
1	GAG	248	N	252	G	ADAPTED	0.000303043	0.0519618
1	GAG	248	T	252	H	NONADAPTED	3.69e-07	0.000231301
1	GAG	248	T	252	N	ADAPTED	2.28e-10	3.72e-07
1	GAG	260	D	252	H	ADAPTED	0.00103191	0.122335
1	GAG	260	E	252	N	ADAPTED	0.000992661	0.11926
1	GAG	268	L	252	H	NONADAPTED	0.000119376	0.0265011
1	GAG	385	G	252	H	NONADAPTED	9.44e-05	0.0221504
1	GAG	387	G	252	H	NONADAPTED	0.002039	0.187361
1	GAG	390	I	252	G	ADAPTED	0.00116796	0.132113
1	GAG	472	S	252	G	ADAPTED	0.000935007	0.114082
1	GAG	473	F	252	N	NONADAPTED	0.00140006	0.147515
1	GAG	483	T	252	H	ADAPTED	0.00206763	0.188678
1	GAG	18	G	255	P	NONADAPTED	0.000272577	0.0482892
1	GAG	81	L	255	A	ADAPTED	0.0010474	0.123588
1	GAG	252	H	255	P	ADAPTED	5.22e-05	0.0139996
1	GAG	252	N	255	P	ADAPTED	0.000108975	0.0249881
1	GAG	497	H	255	A	ADAPTED	0.000294563	0.0509606
1	GAG	497	H	255	P	NONADAPTED	0.00105585	0.124118
1	GAG	12	E	256	V	NONADAPTED	8.37e-06	0.00319616
1	GAG	147	L	256	V	NONADAPTED	0.00136418	0.145437
1	GAG	173	S	256	I	ADAPTED	2.46e-09	3.03e-06
1	GAG	173	V	256	I	NONADAPTED	0.000661891	0.0895855
1	GAG	173	A	256	T	ADAPTED	1.92e-05	0.0062986
1	GAG	173	S	256	V	NONADAPTED	3.52e-07	0.000224448
1	GAG	215	M	256	V	ADAPTED	0.000548578	0.0786366
1	GAG	242	T	256	I	NONADAPTED	0.00160326	0.160774
1	GAG	248	A	256	I	NONADAPTED	5.3e-07	0.000308762
1	GAG	248	A	256	V	ADAPTED	2.52e-08	2.29e-05
1	GAG	260	E	256	I	NONADAPTED	0.00102654	0.121937
1	GAG	264	T	256	I	NONADAPTED	4.7e-06	0.00197086
1	GAG	264	T	256	V	ADAPTED	3.91e-06	0.00168569
1	GAG	301	F	256	I	NONADAPTED	0.000797936	0.10244
1	GAG	315	H	256	I	NONADAPTED	5.22e-05	0.0139996
1	GAG	315	H	256	V	ADAPTED	0.000956596	0.115983
1	GAG	486	V	256	I	NONADAPTED	0.000893763	0.110719
1	GAG	138	M	257	P	NONADAPTED	0.00137468	0.145936
1	GAG	147	M	257	P	NONADAPTED	0.00115704	0.131573
1	GAG	173	S	257	P	ADAPTED	0.000397153	0.0625806
1	GAG	173	A	257	Q	ADAPTED	0.000279973	0.0493208
1	GAG	173	V	257	Q	ADAPTED	0.000312737	0.0531492
1	GAG	30	M	260	D	ADAPTED	0.000881458	0.1099
1	GAG	30	M	260	E	NONADAPTED	0.00153401	0.156587
1	GAG	136	R	260	D	ADAPTED	2.76e-07	0.000184453
1	GAG	136	R	260	E	NONADAPTED	0.000354575	0.0579839
1	GAG	146	A	260	D	NONADAPTED	0.00031127	0.0530101
1	GAG	146	A	260	E	ADAPTED	0.000420897	0.0649043
1	GAG	176	S	260	D	ADAPTED	7.6e-05	0.0187525
1	GAG	176	S	260	E	NONADAPTED	0.000353484	0.0579839
1	GAG	182	Q	260	D	NONADAPTED	3.01e-05	0.00911957
1	GAG	182	Q	260	E	ADAPTED	3.52e-05	0.0103543
1	GAG	200	M	260	D	NONADAPTED	4.1e-05	0.0116746
1	GAG	200	M	260	E	ADAPTED	0.000124638	0.0274266
1	GAG	248	A	260	D	ADAPTED	3.27e-05	0.00977369
1	GAG	248	A	260	E	NONADAPTED	0.000131306	0.0284869
1	GAG	252	H	260	D	ADAPTED	0.000116015	0.0259829
1	GAG	252	H	260	E	NONADAPTED	0.000132103	0.0285925
1	GAG	256	I	260	D	ADAPTED	0.000241013	0.0442927
1	GAG	256	I	260	E	NONADAPTED	0.000413329	0.0643213
1	GAG	264	G	260	E	NONADAPTED	1.16e-08	1.18e-05
1	GAG	267	V	260	E	ADAPTED	0.000400975	0.0628669
1	GAG	268	I	260	D	ADAPTED	0.000267467	0.0477912
1	GAG	268	I	260	E	NONADAPTED	0.000182428	0.0364938
1	GAG	372	G	260	D	NONADAPTED	0.000266771	0.0477443
1	GAG	372	G	260	E	ADAPTED	0.000534846	0.0770203
1	GAG	28	R	263	K	NONADAPTED	0.00118812	0.133648
1	GAG	28	R	263	R	ADAPTED	0.00118812	0.133648
1	GAG	186	T	263	K	ADAPTED	0.000112659	0.0255526
1	GAG	186	T	263	R	NONADAPTED	0.000112659	0.0255526
1	GAG	136	R	264	G	ADAPTED	4.09e-09	4.75e-06
1	GAG	136	Q	264	R	ADAPTED	2.94e-05	0.00894902
1	GAG	136	R	264	R	NONADAPTED	1.07e-11	2.3e-08
1	GAG	173	A	264	K	ADAPTED	9.78e-34	1.17e-29
1	GAG	173	I	264	K	ADAPTED	1.86e-06	0.000892053
1	GAG	173	V	264	K	ADAPTED	1.02e-05	0.00375102
1	GAG	173	A	264	R	NONADAPTED	1.64e-31	1.79e-27
1	GAG	173	I	264	R	NONADAPTED	3.9e-05	0.011245
1	GAG	239	V	264	K	ADAPTED	1.34e-05	0.00478591
1	GAG	239	V	264	R	NONADAPTED	0.000183348	0.0365611
1	GAG	256	V	264	R	NONADAPTED	2.94e-06	0.00133469
1	GAG	256	V	264	T	ADAPTED	7.8e-07	0.000433931
1	GAG	260	E	264	G	NONADAPTED	0.000240612	0.0442514
1	GAG	267	I	264	R	ADAPTED	5.04e-05	0.0137063
1	GAG	268	L	264	K	NONADAPTED	8.25e-16	3.51e-12
1	GAG	268	L	264	R	ADAPTED	1.11e-16	4.89e-13
1	GAG	148	A	267	I	NONADAPTED	0.000437337	0.0665513
1	GAG	148	A	267	V	ADAPTED	0.000425509	0.0652056
1	GAG	173	S	267	I	ADAPTED	1.29e-12	3.3e-09
1	GAG	173	V	267	I	NONADAPTED	1.7e-06	0.000827144
1	GAG	173	S	267	V	NONADAPTED	2.18e-11	4.41e-08
1	GAG	173	V	267	V	ADAPTED	1.46e-06	0.000739427
1	GAG	182	G	267	I	NONADAPTED	0.000554223	0.0790393
1	GAG	182	G	267	V	ADAPTED	0.000489765	0.0720626
1	GAG	260	E	267	I	NONADAPTED	0.0016167	0.1619
1	GAG	260	E	267	V	ADAPTED	0.00029508	0.0510149
1	GAG	12	K	268	L	ADAPTED	0.000613712	0.0846828
1	GAG	15	R	268	M	ADAPTED	6.86e-05	0.0174966
1	GAG	54	A	268	I	NONADAPTED	0.000621064	0.0854622
1	GAG	103	R	268	M	NONADAPTED	0.00113001	0.129661
1	GAG	146	A	268	L	NONADAPTED	0.000632724	0.0867811
1	GAG	146	A	268	M	ADAPTED	0.00134625	0.144545
1	GAG	215	L	268	L	NONADAPTED	9.47e-11	1.71e-07
1	GAG	215	L	268	M	ADAPTED	3.96e-09	4.61e-06
1	GAG	260	D	268	I	ADAPTED	0.00145808	0.151457
1	GAG	260	E	268	L	ADAPTED	0.000331752	0.0556175
1	GAG	264	K	268	I	ADAPTED	1.05e-06	0.000566723
1	GAG	264	K	268	L	NONADAPTED	1.08e-24	8.72e-21
1	GAG	264	R	268	M	NONADAPTED	3.45e-19	1.92e-15
1	GAG	267	V	268	L	NONADAPTED	0.00120884	0.135136
1	GAG	273	V	268	L	NONADAPTED	1.84e-07	0.000127751
1	GAG	312	E	268	L	NONADAPTED	0.000690413	0.0921737
1	GAG	312	E	268	M	ADAPTED	1.63e-06	0.00080528
1	GAG	335	K	268	L	NONADAPTED	4.45e-06	0.00188372
1	GAG	357	G	268	I	NONADAPTED	0.00135861	0.145151
1	GAG	427	A	268	L	NONADAPTED	0.00176547	0.17093
1	GAG	483	L	268	I	ADAPTED	0.00144893	0.150694
1	GAG	268	L	273	I	ADAPTED	7.06e-05	0.0178471
1	GAG	268	L	273	V	NONADAPTED	1.1e-06	0.000582846
1	GAG	275	R	273	I	ADAPTED	1.84e-06	0.000889047
1	GAG	275	R	273	V	NONADAPTED	1.56e-05	0.0053746
1	GAG	273	V	275	K	ADAPTED	3.53e-07	0.000224448
1	GAG	273	V	275	R	NONADAPTED	3.53e-07	0.000224448
1	GAG	26	N	280	S	ADAPTED	0.000407173	0.0635876
1	GAG	28	T	280	S	ADAPTED	0.00185148	0.175997
1	GAG	59	Q	280	T	ADAPTED	0.000601259	0.0835157
1	GAG	90	K	280	T	ADAPTED	0.000445695	0.0673932
1	GAG	112	Q	280	T	NONADAPTED	7.99e-06	0.00306183
1	GAG	126	N	280	A	ADAPTED	0.000496028	0.0724703
1	GAG	132	F	280	V	ADAPTED	0.00180974	0.173345
1	GAG	138	I	280	A	ADAPTED	3.44e-07	0.00022156
1	GAG	138	I	280	T	NONADAPTED	2.06e-06	0.000975626
1	GAG	147	L	280	V	ADAPTED	0.000436152	0.0664307
1	GAG	159	V	280	I	NONADAPTED	0.00194856	0.182256
1	GAG	159	V	280	T	ADAPTED	3.44e-19	1.92e-15
1	GAG	159	V	280	V	NONADAPTED	2.97e-20	1.91e-16
1	GAG	163	G	280	V	ADAPTED	1.66e-08	1.59e-05
1	GAG	173	S	280	A	NONADAPTED	0.000944816	0.114999
1	GAG	176	S	280	V	NONADAPTED	1.54e-06	0.000770709
1	GAG	207	D	280	T	ADAPTED	6.97e-05	0.0177038
1	GAG	215	L	280	A	ADAPTED	0.00144236	0.150321
1	GAG	273	I	280	T	ADAPTED	0.00047825	0.0708634
1	GAG	281	G	280	V	ADAPTED	0.0004076	0.0635876
1	GAG	286	K	280	S	ADAPTED	2e-05	0.00650912
1	GAG	286	K	280	V	NONADAPTED	5.33e-09	6e-06
1	GAG	301	Y	280	V	NONADAPTED	0.00198879	0.184368
1	GAG	303	V	280	T	ADAPTED	0.00187461	0.177322
1	GAG	309	G	280	T	NONADAPTED	0.00094764	0.115231
1	GAG	310	S	280	S	ADAPTED	0.000638338	0.0874077
1	GAG	310	S	280	V	NONADAPTED	3.18e-06	0.00143061
1	GAG	312	D	280	T	NONADAPTED	3.65e-05	0.0106509
1	GAG	312	D	280	V	ADAPTED	3.96e-11	7.7e-08
1	GAG	326	S	280	S	ADAPTED	0.000915489	0.112521
1	GAG	454	E	280	A	NONADAPTED	0.000575833	0.080923
1	GAG	469	M	280	T	NONADAPTED	0.00159592	0.160445
1	GAG	228	I	281	G	ADAPTED	0.000566582	0.0802091
1	GAG	228	I	281	S	NONADAPTED	0.00199748	0.184968
1	GAG	268	M	281	S	NONADAPTED	0.0012726	0.13981
1	GAG	280	V	281	G	ADAPTED	3.31e-05	0.00986983
1	GAG	86	W	286	K	NONADAPTED	0.00041963	0.0648994
1	GAG	86	W	286	R	ADAPTED	0.00041963	0.0648994
1	GAG	136	Q	286	K	NONADAPTED	0.00052104	0.0755206
1	GAG	136	Q	286	R	ADAPTED	0.00052104	0.0755206
1	GAG	147	I	286	K	NONADAPTED	0.000405976	0.0634526
1	GAG	147	I	286	R	ADAPTED	0.000405976	0.0634526
1	GAG	280	S	286	K	ADAPTED	0.000185042	0.036753
1	GAG	280	V	286	K	NONADAPTED	2.31e-05	0.00730571
1	GAG	280	S	286	R	NONADAPTED	0.000185042	0.036753
1	GAG	280	V	286	R	ADAPTED	2.31e-05	0.00730571
1	GAG	302	K	286	K	NONADAPTED	1e-05	0.00370319
1	GAG	302	K	286	R	ADAPTED	1e-05	0.00370319
1	GAG	303	T	286	K	NONADAPTED	4.61e-10	6.61e-07
1	GAG	303	T	286	R	ADAPTED	4.61e-10	6.61e-07
1	GAG	310	S	286	K	NONADAPTED	1.09e-06	0.000582846
1	GAG	310	S	286	R	ADAPTED	1.09e-06	0.000582846
1	GAG	90	R	292	P	NONADAPTED	0.0016312	0.162624
1	GAG	473	P	292	P	ADAPTED	0.0017039	0.167424
1	GAG	203	E	301	F	NONADAPTED	7.61e-09	8.14e-06
1	GAG	203	E	301	Y	ADAPTED	7.62e-09	8.14e-06
1	GAG	319	D	301	F	ADAPTED	3.37e-06	0.00148783
1	GAG	319	D	301	Y	NONADAPTED	3.37e-06	0.00148783
1	GAG	474	Q	301	F	NONADAPTED	0.00181504	0.173585
1	GAG	474	Q	301	Y	ADAPTED	0.00181482	0.173585
1	GAG	69	N	303	T	NONADAPTED	0.000201316	0.0389972
1	GAG	69	N	303	V	ADAPTED	0.000125236	0.0275339
1	GAG	138	M	303	V	ADAPTED	0.00218375	0.195366
1	GAG	173	S	303	T	NONADAPTED	2.3e-05	0.00729661
1	GAG	173	S	303	V	ADAPTED	0.000289983	0.0505869
1	GAG	286	R	303	T	ADAPTED	3.37e-07	0.000218946
1	GAG	286	R	303	V	NONADAPTED	4.5e-05	0.0124798
1	GAG	312	D	303	T	NONADAPTED	9.79e-05	0.0228866
1	GAG	312	D	303	V	ADAPTED	8.81e-05	0.0210573
1	GAG	498	L	303	V	NONADAPTED	0.00157953	0.159501
1	GAG	111	S	309	A	ADAPTED	0.00127139	0.13981
1	GAG	280	T	309	G	NONADAPTED	0.00225047	0.199345
1	GAG	286	R	309	A	ADAPTED	0.00048909	0.0720441
1	GAG	310	T	309	C	ADAPTED	0.000205419	0.0395689
1	GAG	312	E	309	A	NONADAPTED	0.000236116	0.0436809
1	GAG	340	G	309	G	ADAPTED	0.000111936	0.0254794
1	GAG	370	A	309	A	NONADAPTED	0.000349442	0.0575949
1	GAG	487	I	309	S	ADAPTED	0.000255966	0.0463614
1	GAG	9	R	310	T	ADAPTED	3.73e-05	0.0108128
1	GAG	159	V	310	S	ADAPTED	3.24e-05	0.00971491
1	GAG	242	T	310	S	NONADAPTED	0.00131566	0.142443
1	GAG	242	T	310	T	ADAPTED	0.00196566	0.183308
1	GAG	247	V	310	S	NONADAPTED	0.00151796	0.155424
1	GAG	247	V	310	T	ADAPTED	0.00189634	0.178569
1	GAG	280	V	310	S	NONADAPTED	2.27e-06	0.00105736
1	GAG	280	S	310	T	NONADAPTED	0.00147871	0.152777
1	GAG	280	V	310	T	ADAPTED	2.89e-05	0.00883874
1	GAG	286	R	310	S	ADAPTED	1.1e-07	7.99e-05
1	GAG	286	R	310	T	NONADAPTED	1.3e-07	9.31e-05
1	GAG	301	F	310	S	NONADAPTED	6.98e-08	5.34e-05
1	GAG	309	C	310	S	NONADAPTED	0.000157996	0.0327465
1	GAG	309	C	310	T	ADAPTED	5.08e-05	0.0137803
1	GAG	312	E	310	S	NONADAPTED	4.06e-06	0.00174004
1	GAG	312	E	310	T	ADAPTED	1.31e-10	2.27e-07
1	GAG	370	M	310	S	NONADAPTED	0.000348363	0.0574549
1	GAG	386	T	310	T	ADAPTED	0.00196764	0.183424
1	GAG	482	G	310	S	ADAPTED	0.000206192	0.039647
1	GAG	252	S	311	Q	NONADAPTED	7.11e-05	0.0179138
1	GAG	58	Q	312	D	NONADAPTED	0.00129281	0.140882
1	GAG	58	Q	312	E	ADAPTED	0.00110212	0.127525
1	GAG	138	M	312	D	NONADAPTED	3.64e-07	0.000229855
1	GAG	138	M	312	E	ADAPTED	4.04e-07	0.000249045
1	GAG	159	V	312	D	ADAPTED	0.000220763	0.041601
1	GAG	159	V	312	E	NONADAPTED	0.00018064	0.0362226
1	GAG	173	T	312	D	ADAPTED	3.99e-06	0.00171357
1	GAG	173	T	312	E	NONADAPTED	4.85e-06	0.00202098
1	GAG	203	E	312	D	NONADAPTED	1.59e-10	2.67e-07
1	GAG	203	E	312	E	ADAPTED	4.97e-11	9.45e-08
1	GAG	252	S	312	D	ADAPTED	0.000257431	0.0465663
1	GAG	252	S	312	E	NONADAPTED	0.000283933	0.0496792
1	GAG	268	M	312	D	NONADAPTED	0.00190138	0.178775
1	GAG	268	M	312	E	ADAPTED	0.00115906	0.131634
1	GAG	280	V	312	D	ADAPTED	1.85e-06	0.000892053
1	GAG	280	V	312	E	NONADAPTED	5.49e-06	0.0022547
1	GAG	303	V	312	D	ADAPTED	9.97e-08	7.35e-05
1	GAG	303	V	312	E	NONADAPTED	1.55e-06	0.000774123
1	GAG	310	T	312	D	NONADAPTED	1.3e-06	0.000670521
1	GAG	310	T	312	E	ADAPTED	7.99e-08	6.06e-05
1	GAG	315	N	312	D	ADAPTED	9.2e-05	0.0218638
1	GAG	315	N	312	E	NONADAPTED	9.42e-05	0.0221504
1	GAG	326	A	312	D	ADAPTED	4.54e-07	0.000272702
1	GAG	326	A	312	E	NONADAPTED	4.54e-07	0.000272702
1	GAG	332	T	312	D	ADAPTED	0.000257909	0.0466123
1	GAG	332	T	312	E	NONADAPTED	0.000238397	0.0440377
1	GAG	490	K	312	D	ADAPTED	0.0010698	0.12519
1	GAG	490	K	312	E	NONADAPTED	0.00113162	0.129741
1	GAG	173	A	315	T	ADAPTED	1.47e-06	0.000742496
1	GAG	218	A	315	H	ADAPTED	0.00125546	0.138618
1	GAG	312	E	315	N	NONADAPTED	0.000454096	0.068252
1	GAG	399	R	316	W	NONADAPTED	0.000234566	0.0435203
1	GAG	62	E	319	E	ADAPTED	0.00126627	0.139504
1	GAG	173	S	319	E	ADAPTED	0.000171047	0.0348263
1	GAG	186	T	319	D	ADAPTED	9.36e-05	0.0220906
1	GAG	301	F	319	D	ADAPTED	4.4e-07	0.000266852
1	GAG	301	F	319	E	NONADAPTED	5.15e-05	0.0139029
1	GAG	280	V	326	A	ADAPTED	0.00173968	0.169413
1	GAG	280	V	326	S	NONADAPTED	0.00176761	0.171071
1	GAG	312	E	326	A	NONADAPTED	4.69e-07	0.000280285
1	GAG	312	E	326	S	ADAPTED	5.18e-07	0.000302646
1	GAG	362	I	326	A	NONADAPTED	9.98e-06	0.0037017
1	GAG	362	I	326	S	ADAPTED	0.000130781	0.0284296
1	GAG	453	L	326	A	ADAPTED	0.00135747	0.145151
1	GAG	453	L	326	S	NONADAPTED	0.00143077	0.149814
1	GAG	173	T	331	K	NONADAPTED	1.88e-07	0.000129689
1	GAG	173	T	331	R	ADAPTED	1.88e-07	0.000129689
1	GAG	273	I	331	K	ADAPTED	0.000766655	0.0995445
1	GAG	273	I	331	R	NONADAPTED	0.000766655	0.0995445
1	GAG	286	R	331	K	NONADAPTED	2.68e-05	0.008318
1	GAG	286	R	331	R	ADAPTED	2.68e-05	0.008318
1	GAG	82	I	332	S	ADAPTED	0.00168662	0.166169
1	GAG	163	A	332	T	ADAPTED	0.000782327	0.101004
1	GAG	173	T	332	N	ADAPTED	0.00103619	0.12261
1	GAG	173	T	332	T	NONADAPTED	0.000400077	0.0627652
1	GAG	312	E	332	S	ADAPTED	0.00137747	0.145985
1	GAG	336	A	332	T	ADAPTED	0.000495581	0.0724472
1	GAG	163	A	335	K	ADAPTED	9.11e-07	0.000496577
1	GAG	163	A	335	R	NONADAPTED	8.99e-07	0.000492457
1	GAG	173	T	335	K	NONADAPTED	7.57e-06	0.00293246
1	GAG	173	T	335	R	ADAPTED	7.49e-06	0.00290273
1	GAG	228	L	335	K	NONADAPTED	0.00162154	0.162255
1	GAG	228	L	335	R	ADAPTED	0.00161894	0.162059
1	GAG	301	F	335	K	NONADAPTED	3.52e-07	0.000224448
1	GAG	301	F	335	R	ADAPTED	3.51e-07	0.000224448
1	GAG	332	T	336	A	ADAPTED	0.000598475	0.0832212
1	GAG	463	F	336	A	ADAPTED	0.00206536	0.188678
1	GAG	15	A	339	T	ADAPTED	4.02e-05	0.0115497
1	GAG	127	K	339	P	NONADAPTED	0.000401665	0.0629357
1	GAG	163	G	339	T	ADAPTED	5.58e-06	0.00228731
1	GAG	340	G	339	P	NONADAPTED	5.86e-08	4.71e-05
1	GAG	340	G	339	Q	ADAPTED	3.03e-05	0.00917015
1	GAG	449	P	339	S	ADAPTED	0.001155	0.13153
1	GAG	147	L	340	A	NONADAPTED	3.5e-12	7.97e-09
1	GAG	147	L	340	G	ADAPTED	6.75e-13	1.82e-09
1	GAG	182	G	340	A	NONADAPTED	0.00179862	0.172686
1	GAG	182	G	340	G	ADAPTED	0.00128423	0.140312
1	GAG	242	T	340	A	ADAPTED	0.000130568	0.0284296
1	GAG	242	T	340	G	NONADAPTED	0.000149642	0.0314218
1	GAG	309	G	340	A	NONADAPTED	0.00081844	0.104325
1	GAG	309	G	340	G	ADAPTED	0.000713716	0.0944802
1	GAG	326	A	340	A	ADAPTED	0.000367672	0.0593822
1	GAG	326	A	340	G	NONADAPTED	0.000223909	0.0419798
1	GAG	339	P	340	A	ADAPTED	1.46e-05	0.00513483
1	GAG	339	P	340	G	NONADAPTED	9.13e-06	0.00345002
1	GAG	345	D	340	A	NONADAPTED	3.68e-08	3.17e-05
1	GAG	345	D	340	G	ADAPTED	2.52e-08	2.29e-05
1	GAG	112	Q	342	T	NONADAPTED	0.000476692	0.0707998
1	GAG	161	D	342	S	ADAPTED	0.00212576	0.192096
1	GAG	163	A	342	S	NONADAPTED	0.00192425	0.180384
1	GAG	173	T	342	S	ADAPTED	0.00200921	0.185439
1	GAG	173	T	342	T	NONADAPTED	0.00177336	0.171495
1	GAG	248	G	342	T	ADAPTED	0.000340184	0.0564772
1	GAG	302	K	342	T	ADAPTED	0.000904985	0.111668
1	GAG	381	S	342	S	NONADAPTED	0.00156652	0.158776
1	GAG	398	D	342	T	NONADAPTED	0.00129104	0.140749
1	GAG	411	R	344	K	ADAPTED	0.00064792	0.0882381
1	GAG	67	S	345	E	NONADAPTED	0.00166008	0.164341
1	GAG	340	G	345	D	ADAPTED	1.55e-07	0.000110156
1	GAG	340	G	345	E	NONADAPTED	6.84e-06	0.00269055
1	GAG	55	D	348	A	ADAPTED	0.00062667	0.0861391
1	GAG	84	V	348	A	ADAPTED	0.000112031	0.0254794
1	GAG	200	I	348	A	ADAPTED	4.25e-05	0.0119993
1	GAG	312	E	348	S	ADAPTED	0.000340978	0.0565442
1	GAG	312	E	348	T	NONADAPTED	0.000444463	0.0673286
1	GAG	1	I	354	G	NONADAPTED	0.000739225	0.0970377
1	GAG	232	K	354	R	ADAPTED	0.000395218	0.0624326
1	GAG	186	I	357	G	NONADAPTED	0.000234265	0.0435203
1	GAG	186	I	357	S	ADAPTED	8.97e-05	0.0214284
1	GAG	264	G	357	G	NONADAPTED	0.00130407	0.141616
1	GAG	264	G	357	S	ADAPTED	0.000312934	0.0531492
1	GAG	286	R	357	A	NONADAPTED	0.0004263	0.0652869
1	GAG	286	R	357	G	ADAPTED	1.13e-09	1.49e-06
1	GAG	286	R	357	S	NONADAPTED	2.39e-05	0.00753356
1	GAG	332	N	357	G	NONADAPTED	0.00036038	0.0586273
1	GAG	332	N	357	S	ADAPTED	8.1e-05	0.0196329
1	GAG	362	V	357	G	ADAPTED	2.47e-14	8.96e-11
1	GAG	362	V	357	S	NONADAPTED	8.26e-15	3.29e-11
1	GAG	370	A	357	G	NONADAPTED	2.18e-12	5.48e-09
1	GAG	370	T	357	G	NONADAPTED	0.00139304	0.1472
1	GAG	370	A	357	S	ADAPTED	7.71e-14	2.42e-10
1	GAG	370	T	357	S	ADAPTED	0.00109699	0.127165
1	GAG	479	L	357	G	NONADAPTED	3.53e-05	0.0103668
1	GAG	479	L	357	S	ADAPTED	0.000346664	0.0572878
1	GAG	91	N	361	K	ADAPTED	0.00178457	0.171818
1	GAG	91	N	361	R	NONADAPTED	0.00178457	0.171818
1	GAG	362	I	361	K	ADAPTED	1.36e-14	5.15e-11
1	GAG	362	I	361	R	NONADAPTED	1.36e-14	5.15e-11
1	GAG	115	T	362	I	NONADAPTED	1.83e-05	0.00604223
1	GAG	115	T	362	V	ADAPTED	1.76e-05	0.00587089
1	GAG	215	V	362	I	NONADAPTED	0.00106678	0.125108
1	GAG	215	V	362	V	ADAPTED	0.00108648	0.126344
1	GAG	248	G	362	I	ADAPTED	0.0001809	0.0362459
1	GAG	248	G	362	V	NONADAPTED	0.000163347	0.033505
1	GAG	286	R	362	I	ADAPTED	0.000120938	0.0267532
1	GAG	286	R	362	V	NONADAPTED	0.000113213	0.0256089
1	GAG	326	A	362	I	NONADAPTED	7.38e-05	0.0183743
1	GAG	326	A	362	V	ADAPTED	7.99e-05	0.0194391
1	GAG	357	S	362	I	ADAPTED	2.24e-10	3.67e-07
1	GAG	357	S	362	V	NONADAPTED	2e-10	3.32e-07
1	GAG	361	R	362	I	NONADAPTED	3.39e-14	1.17e-10
1	GAG	361	R	362	V	ADAPTED	3.41e-14	1.17e-10
1	GAG	477	G	362	I	NONADAPTED	4.41e-05	0.0122621
1	GAG	477	G	362	V	ADAPTED	4.4e-05	0.0122621
1	GAG	362	I	363	L	NONADAPTED	0.000305053	0.0521639
1	GAG	362	I	363	M	ADAPTED	1.72e-05	0.00579537
1	GAG	370	L	363	L	NONADAPTED	0.000177425	0.0356922
1	GAG	370	L	363	M	ADAPTED	0.00011897	0.0264578
1	GAG	79	Y	369	H	NONADAPTED	0.000262167	0.0471442
1	GAG	79	Y	369	Q	ADAPTED	0.00115513	0.13153
1	GAG	173	T	369	Q	ADAPTED	0.000663584	0.0896899
1	GAG	248	R	369	Q	NONADAPTED	0.000265961	0.0476896
1	GAG	252	H	369	K	ADAPTED	0.00159866	0.160482
1	GAG	463	F	369	H	NONADAPTED	0.00134659	0.144545
1	GAG	124	N	370	I	ADAPTED	0.00068543	0.091773
1	GAG	256	I	370	V	NONADAPTED	0.000399306	0.0627228
1	GAG	286	R	370	A	ADAPTED	0.000149684	0.0314218
1	GAG	357	S	370	A	ADAPTED	3.93e-07	0.000244177
1	GAG	362	V	370	A	ADAPTED	0.00122145	0.136061
1	GAG	363	M	370	L	ADAPTED	0.000689548	0.0921562
1	GAG	363	L	370	V	ADAPTED	0.000942687	0.114795
1	GAG	369	H	370	A	NONADAPTED	0.000232287	0.0432718
1	GAG	371	T	370	I	NONADAPTED	8.2e-05	0.0198131
1	GAG	372	A	370	A	ADAPTED	0.000825961	0.105064
1	GAG	372	A	370	V	NONADAPTED	1.52e-05	0.00531007
1	GAG	373	A	370	A	ADAPTED	1.08e-05	0.00397254
1	GAG	373	L	370	A	ADAPTED	0.00157436	0.159314
1	GAG	373	P	370	A	NONADAPTED	1.16e-08	1.19e-05
1	GAG	374	A	370	A	ADAPTED	0.000395551	0.0624328
1	GAG	374	V	370	A	ADAPTED	0.000352945	0.0579533
1	GAG	375	I	370	A	ADAPTED	0.00129991	0.141348
1	GAG	375	T	370	A	NONADAPTED	2.49e-05	0.0078202
1	GAG	375	T	370	V	ADAPTED	0.000145342	0.0307938
1	GAG	376	V	370	A	NONADAPTED	1.99e-05	0.00646544
1	GAG	376	I	370	T	NONADAPTED	5.4e-05	0.0144073
1	GAG	381	G	370	A	ADAPTED	0.00024901	0.0454295
1	GAG	383	F	370	A	ADAPTED	0.000653855	0.0886613
1	GAG	418	Q	370	V	NONADAPTED	0.00101295	0.121233
1	GAG	15	E	371	S	ADAPTED	2.98e-05	0.00904276
1	GAG	113	K	371	A	NONADAPTED	4.84e-05	0.0132696
1	GAG	370	I	371	Q	ADAPTED	3.54e-05	0.0103821
1	GAG	370	I	371	T	NONADAPTED	1.5e-06	0.000757879
1	GAG	372	Q	371	A	ADAPTED	3.61e-05	0.0105425
1	GAG	372	T	371	T	NONADAPTED	6.94e-06	0.00271932
1	GAG	373	S	371	T	ADAPTED	0.00182236	0.173953
1	GAG	378	I	371	S	ADAPTED	9.37e-06	0.0035194
1	GAG	465	F	371	Q	NONADAPTED	0.00032091	0.0542467
1	GAG	58	K	372	N	ADAPTED	0.000152214	0.0318729
1	GAG	64	I	372	N	NONADAPTED	0.00128402	0.140312
1	GAG	67	T	372	H	ADAPTED	0.00107492	0.125469
1	GAG	186	M	372	Q	ADAPTED	0.00138979	0.14698
1	GAG	247	V	372	Q	ADAPTED	0.000844257	0.10664
1	GAG	260	E	372	G	ADAPTED	0.0001199	0.0265704
1	GAG	370	V	372	A	NONADAPTED	1.33e-06	0.000682698
1	GAG	373	S	372	N	ADAPTED	2.02e-05	0.00655398
1	GAG	373	Q	372	Q	ADAPTED	3.58e-06	0.00157141
1	GAG	374	S	372	A	ADAPTED	0.000586437	0.0818649
1	GAG	374	A	372	H	NONADAPTED	5.49e-05	0.0145524
1	GAG	374	S	372	T	ADAPTED	0.00177544	0.171615
1	GAG	389	I	372	T	NONADAPTED	0.000350917	0.0577244
1	GAG	418	R	372	S	ADAPTED	0.000138398	0.0296812
1	GAG	18	R	373	P	NONADAPTED	0.000238043	0.0440048
1	GAG	18	R	373	S	ADAPTED	7.69e-05	0.0188758
1	GAG	31	L	373	H	NONADAPTED	7.67e-05	0.0188625
1	GAG	125	C	373	L	ADAPTED	0.000420405	0.0649043
1	GAG	147	V	373	A	ADAPTED	0.000145136	0.0307763
1	GAG	200	I	373	A	ADAPTED	0.00186421	0.176805
1	GAG	242	S	373	S	NONADAPTED	0.000444236	0.0673286
1	GAG	286	R	373	P	ADAPTED	0.00158622	0.159869
1	GAG	357	G	373	P	NONADAPTED	0.000207874	0.0398673
1	GAG	370	A	373	A	ADAPTED	2.8e-06	0.0012792
1	GAG	370	A	373	P	NONADAPTED	5.84e-09	6.51e-06
1	GAG	371	T	373	V	NONADAPTED	0.000299392	0.0514766
1	GAG	372	N	373	P	NONADAPTED	7.93e-05	0.019363
1	GAG	372	N	373	S	ADAPTED	7.12e-05	0.0179244
1	GAG	374	N	373	A	ADAPTED	1.69e-05	0.00570701
1	GAG	374	A	373	N	NONADAPTED	0.000894525	0.110759
1	GAG	374	A	373	S	ADAPTED	0.000594584	0.082726
1	GAG	375	A	373	L	ADAPTED	0.000682775	0.0915965
1	GAG	375	A	373	S	ADAPTED	3.68e-05	0.0106896
1	GAG	377	L	373	T	ADAPTED	6.87e-05	0.0174966
1	GAG	378	I	373	P	ADAPTED	3.68e-06	0.00160112
1	GAG	378	I	373	S	NONADAPTED	1.5e-05	0.00526585
1	GAG	385	G	373	P	NONADAPTED	0.000146879	0.0309741
1	GAG	471	A	373	T	ADAPTED	0.00138238	0.146444
1	GAG	478	S	373	S	ADAPTED	0.00122563	0.136296
1	GAG	66	S	374	A	ADAPTED	0.00100228	0.120185
1	GAG	124	K	374	T	NONADAPTED	0.00180291	0.172952
1	GAG	173	T	374	A	NONADAPTED	0.000772516	0.100098
1	GAG	215	I	374	N	ADAPTED	0.00203707	0.187285
1	GAG	267	I	374	N	NONADAPTED	0.00112552	0.129515
1	GAG	326	A	374	N	ADAPTED	0.000875203	0.109464
1	GAG	357	G	374	N	NONADAPTED	0.00116744	0.132113
1	GAG	372	H	374	A	NONADAPTED	0.0013269	0.143351
1	GAG	372	H	374	N	ADAPTED	0.000812896	0.103882
1	GAG	373	S	374	A	ADAPTED	2.43e-07	0.000163662
1	GAG	373	A	374	N	ADAPTED	0.000606981	0.0840754
1	GAG	373	T	374	N	ADAPTED	0.000360214	0.0586273
1	GAG	373	P	374	P	ADAPTED	0.000919195	0.112646
1	GAG	375	A	374	A	NONADAPTED	2.35e-06	0.00108982
1	GAG	375	N	374	N	NONADAPTED	3.37e-07	0.000218946
1	GAG	375	T	374	T	NONADAPTED	3.14e-10	4.8e-07
1	GAG	375	T	374	V	NONADAPTED	0.00131175	0.142142
1	GAG	380	K	374	N	NONADAPTED	7.23e-07	0.000404745
1	GAG	383	F	374	N	ADAPTED	0.0015074	0.154677
1	GAG	386	P	374	V	ADAPTED	0.000129229	0.0281724
1	GAG	398	Q	374	P	ADAPTED	0.00122737	0.136296
1	GAG	427	T	374	S	ADAPTED	0.000491017	0.0721995
1	GAG	429	G	374	S	ADAPTED	0.000376485	0.0604632
1	GAG	443	G	374	T	NONADAPTED	0.00162952	0.162614
1	GAG	26	R	375	N	NONADAPTED	0.000448532	0.0676682
1	GAG	84	V	375	T	ADAPTED	6.07e-06	0.00244577
1	GAG	218	P	375	N	ADAPTED	2.59e-05	0.00805833
1	GAG	218	P	375	T	NONADAPTED	0.00151182	0.154986
1	GAG	370	V	375	A	NONADAPTED	0.000474705	0.0705884
1	GAG	370	V	375	T	ADAPTED	4.51e-07	0.000271816
1	GAG	373	S	375	A	ADAPTED	1.13e-06	0.000595906
1	GAG	374	A	375	A	NONADAPTED	9.83e-06	0.00365888
1	GAG	374	N	375	I	ADAPTED	1.56e-07	0.000110466
1	GAG	374	N	375	N	NONADAPTED	1.9e-07	0.000130925
1	GAG	374	G	375	T	NONADAPTED	0.00108606	0.126344
1	GAG	374	T	375	T	NONADAPTED	8.77e-10	1.18e-06
1	GAG	374	V	375	T	NONADAPTED	0.00102661	0.121937
1	GAG	380	K	375	N	NONADAPTED	2.02e-08	1.89e-05
1	GAG	380	K	375	T	ADAPTED	1.16e-05	0.00420664
1	GAG	389	I	375	I	ADAPTED	0.000942495	0.114795
1	GAG	465	F	375	A	ADAPTED	0.000701243	0.0932986
1	GAG	469	M	375	A	ADAPTED	0.00175635	0.170514
1	GAG	471	A	375	I	ADAPTED	0.0017981	0.172686
1	GAG	484	Y	375	A	ADAPTED	9e-05	0.0214877
1	GAG	49	S	376	I	NONADAPTED	0.00118281	0.133355
1	GAG	69	P	376	I	NONADAPTED	0.00125358	0.138472
1	GAG	73	E	376	I	ADAPTED	0.000611575	0.0845037
1	GAG	143	V	376	I	NONADAPTED	0.00034002	0.0564772
1	GAG	370	L	376	I	NONADAPTED	0.000559767	0.0795422
1	GAG	370	A	376	V	NONADAPTED	7.17e-05	0.0180019
1	GAG	449	P	376	A	ADAPTED	0.000539156	0.0774402
1	GAG	90	R	377	L	ADAPTED	0.000104931	0.0243276
1	GAG	90	R	377	M	NONADAPTED	0.00016973	0.0346111
1	GAG	373	T	377	L	ADAPTED	0.000199832	0.0388351
1	GAG	373	T	377	M	NONADAPTED	0.000518997	0.0754745
1	GAG	48	A	378	M	NONADAPTED	0.00178389	0.171818
1	GAG	373	P	378	I	ADAPTED	3.52e-07	0.000224448
1	GAG	373	P	378	M	NONADAPTED	1.86e-08	1.76e-05
1	GAG	380	G	378	M	NONADAPTED	8.24e-09	8.65e-06
1	GAG	380	G	378	V	ADAPTED	9.44e-08	7.03e-05
1	GAG	382	K	378	V	ADAPTED	0.000131387	0.0284869
1	GAG	403	R	378	I	ADAPTED	0.000728657	0.0961537
1	GAG	425	E	378	M	NONADAPTED	0.000869874	0.109189
1	GAG	472	H	378	M	NONADAPTED	0.000268042	0.0477912
1	GAG	98	K	380	R	ADAPTED	0.00139885	0.147503
1	GAG	123	G	380	K	ADAPTED	0.000223564	0.0419464
1	GAG	264	R	380	K	NONADAPTED	1.72e-07	0.000120884
1	GAG	264	R	380	R	ADAPTED	1.57e-10	2.65e-07
1	GAG	370	A	380	R	ADAPTED	0.00169429	0.166676
1	GAG	374	N	380	K	NONADAPTED	2.55e-05	0.00796282
1	GAG	374	N	380	R	ADAPTED	0.000127814	0.0280025
1	GAG	375	N	380	K	NONADAPTED	2.16e-05	0.00689469
1	GAG	375	N	380	R	ADAPTED	1.2e-08	1.22e-05
1	GAG	378	M	380	G	NONADAPTED	6.07e-08	4.81e-05
1	GAG	382	K	380	N	ADAPTED	0.0010294	0.122096
1	GAG	383	F	380	K	ADAPTED	0.000418074	0.0647385
1	GAG	383	L	380	R	ADAPTED	0.00143286	0.149893
1	GAG	384	K	380	K	NONADAPTED	2.71e-08	2.43e-05
1	GAG	384	K	380	R	ADAPTED	2.08e-07	0.000142339
1	GAG	385	S	380	K	ADAPTED	6.67e-06	0.00264595
1	GAG	385	S	380	R	NONADAPTED	6.58e-05	0.0169473
1	GAG	398	V	380	G	ADAPTED	1.11e-06	0.000587027
1	GAG	398	E	380	R	ADAPTED	4.3e-05	0.0120907
[truncated: 5,092 more rows]
